# Supplementary material for: Genome-Wide Analysis of Circular RNAs Mediated ceRNA Regulation in Porcine Embryonic Muscle Development
Source: Front Cell Dev Biol. 2019 Nov 19;7:289. doi: 10.3389/fcell.2019.00289 (PMC6877547; doi:10.3389/fcell.2019.00289)
Supplement: Supplementary file 4 [file Table_4.XLSX]

## Sheet: GO enrichment analysis
Supplementary Table S4 GO term enrichment analysis of the host gene of circRNAs
Category	Count	%	Pvalue	List Total	Pop Hits	Pop Total	Fold Enrichment	Bonferroni	Benjamini	FDR	Term	Genes
GOTERM_BP_DIRECT	8	1.91388	1.63964e-05	370	38	16792	9.55448	0.02878	0.02878	0.0278052	GO:0030049~muscle filament sliding	TMOD1, TNNT1, MYH3, MYBPC1, TPM3, MYBPC2, MYH8, MYL6
GOTERM_BP_FAT	8	1.91388	1.67167e-05	368	38	16650	9.52517	0.0737985	0.0737985	0.0315187	GO:0033275~actin-myosin filament sliding	TMOD1, TNNT1, MYH3, MYBPC1, TPM3, MYBPC2, MYH8, MYL6
GOTERM_BP_FAT	8	1.91388	1.67167e-05	368	38	16650	9.52517	0.0737985	0.0737985	0.0315187	GO:0030049~muscle filament sliding	TMOD1, TNNT1, MYH3, MYBPC1, TPM3, MYBPC2, MYH8, MYL6
GOTERM_CC_DIRECT	23	5.50239	3.77237e-05	390	391	18224	2.74872	0.0152366	0.0152366	0.0527372	GO:0005925~focal adhesion	SRP68, LIMS2, ARPC2, CLASP2, VASP, CDH13, KRAS, SNTB1, IGF2R, PAK4, ANXA5, ARHGAP31, CD44, FAP, CD99L2, ITGB1BP1, PDLIM1, AFAP1, DNM2, ITGA6, IQGAP1, PEAK1, TNC
GOTERM_CC_DIRECT	74	17.7033	7.65722e-05	390	2200	18224	1.57177	0.0306854	0.0154622	0.10702	GO:0016020~membrane	MED14, FKBP5, SFXN4, CLASP2, ANKRA2, RNF141, ACSL1, LEPR, IGF2R, CYFIP2, ACE, HSD17B4, CLINT1, DDX47, SLC12A2, LMAN2, SREBF2, ARHGEF12, PALM, KIDINS220, SLC22A3, CALCR, PSMB2, GRAMD1B, MMD, NCOR2, TMOD1, MLF2, EIF3K, ZDHHC3, SGMS1, OSBPL8, AKAP1, TOMM34, NUP85, DLST, MYL6, EI24, XYLT2, PNPLA8, STON2, HCLS1, P3H1, SLC7A2, CERS6, SLC39A11, PDE3B, HECA, ITGB1BP1, COPB1, MOSPD2, OPA1, HSDL2, EIF3D, S…
GOTERM_CC_FAT	23	5.50239	0.000149949	343	391	14527	2.49134	0.087827	0.087827	0.221883	GO:0005925~focal adhesion	SRP68, LIMS2, ARPC2, CLASP2, VASP, CDH13, KRAS, SNTB1, IGF2R, PAK4, ANXA5, ARHGAP31, CD44, FAP, CD99L2, ITGB1BP1, PDLIM1, AFAP1, DNM2, ITGA6, IQGAP1, PEAK1, TNC
GOTERM_CC_FAT	23	5.50239	0.000167838	343	394	14527	2.47237	0.0977767	0.0501457	0.248323	GO:0005924~cell-substrate adherens junction	SRP68, LIMS2, ARPC2, CLASP2, VASP, CDH13, KRAS, SNTB1, IGF2R, PAK4, ANXA5, ARHGAP31, CD44, FAP, CD99L2, ITGB1BP1, PDLIM1, AFAP1, DNM2, ITGA6, IQGAP1, PEAK1, TNC
GOTERM_CC_DIRECT	100	23.9234	0.00019827	390	3315	18224	1.4096	0.0775332	0.0265427	0.27689	GO:0005829~cytosol	ANKRA2, TYMS, EHD2, ATG4D, EXOC6, PAIP1, STAT3, SREBF2, KARS, ARHGEF12, KIDINS220, MYO10, MYLK3, ARPC2, VASP, WDTC1, MYBPC1, TPM3, PLCG2, PSMB2, EXOSC7, AMD1, TOP3A, CFLAR, RAP1GAP2, PRKAR1B, EIF3K, TUBGCP5, NUP85, CCT8, SYNJ1, WSB1, TNNT1, NBN, DSTYK, CEP164, WDR1, ITGB1BP1, RBCK1, ATG7, EIF3D, OCRL, CAST, CASP9, GCC2, DIABLO, HK2, HAGH, IQGAP1, SRP68, CLASP2, CYFIP2, SIRT2, GRK4, SLBP, CTNND1, …
GOTERM_CC_FAT	23	5.50239	0.000200657	343	399	14527	2.44139	0.115749	0.0401756	0.296812	GO:0030055~cell-substrate junction	SRP68, LIMS2, ARPC2, CLASP2, VASP, CDH13, KRAS, SNTB1, IGF2R, PAK4, ANXA5, ARHGAP31, CD44, FAP, CD99L2, ITGB1BP1, PDLIM1, AFAP1, DNM2, ITGA6, IQGAP1, PEAK1, TNC
GOTERM_CC_FAT	33	7.89474	0.000340451	343	711	14527	1.96574	0.188388	0.0508449	0.503112	GO:0070161~anchoring junction	SRP68, LIMS2, CTNNA3, CDH13, CLASP2, IGF2R, CTNND1, CLINT1, ARHGAP31, CD44, CD99L2, ITGB1BP1, AFAP1, PDLIM1, PEAK1, TNC, ARPC2, CAST, VASP, KRAS, SNTB1, EIF2A, PAK4, JAM3, ANXA5, GOLGA3, ZC3HAV1, FAP, SPTAN1, DNM2, ITGA6, IQGAP1, CCT8
GOTERM_BP_FAT	10	2.39234	0.00036278	368	100	16650	4.52446	0.810622	0.564824	0.681898	GO:0070252~actin-mediated cell contraction	TMOD1, CTNNA3, TNNT1, MYH3, MYBPC1, TPM3, KCNQ1, MYBPC2, MYH8, MYL6
GOTERM_MF_FAT	48	11.4833	0.000424505	338	1306	15478	1.68305	0.356979	0.356979	0.671933	GO:0044877~macromolecular complex binding	POLR1A, SRP68, CTNNA3, CDH13, SCARB1, CLASP2, ANKRA2, DHX30, SIRT2, WDR1, HCLS1, P3H1, KDM6A, POLA1, CD44, ITGB1BP1, STAT3, WDR12, MYH8, ANTXR1, MYO10, PPARG, LMBRD1, ARPC2, CTSB, BAZ1B, CTSS, TPM3, KRAS, EIF2A, UHRF1, JAM3, WDR82, NCOR2, FYN, CFLAR, TMOD1, FAP, PEX1, NDEL1, EIF3K, MYH3, VLDLR, DNM2, MTRF1L, ITGA6, IQGAP1, UCHL5
GOTERM_MF_FAT	21	5.02392	0.000456857	338	397	15478	2.42229	0.378264	0.211498	0.722969	GO:0003779~actin binding	CTNNA3, ARPC2, CLASP2, VASP, MYBPC1, TPM3, SNTB1, ACE, WDR1, HCLS1, KLHL5, TMOD1, AFAP1, FBXO25, MYH3, MYOZ2, SPTAN1, MYBPC2, MYH8, ANTXR1, MYO10
GOTERM_CC_FAT	32	7.6555	0.000478566	343	694	14527	1.95287	0.254299	0.0569974	0.70654	GO:0005912~adherens junction	SRP68, LIMS2, CTNNA3, CDH13, CLASP2, IGF2R, CTNND1, CLINT1, ARHGAP31, CD44, CD99L2, ITGB1BP1, AFAP1, PDLIM1, PEAK1, TNC, ARPC2, CAST, VASP, KRAS, SNTB1, EIF2A, PAK4, ANXA5, GOLGA3, ZC3HAV1, FAP, SPTAN1, DNM2, ITGA6, IQGAP1, CCT8
GOTERM_BP_FAT	75	17.9426	0.000586913	368	2323	16650	1.46076	0.93228	0.592395	1.10099	GO:0051128~regulation of cellular component organization	EGF, TFIP11, FBXO38, CLASP2, ANKRA2, EHD2, SIRT2, ACE, KLHL41, OGFOD1, AFAP1, LMAN2, SREBF2, PALM, CEP295, ANTXR1, KIDINS220, PPARG, MYO10, MYLK3, KIF9, CDC23, ARPC2, VASP, NAPB, MYBPC1, STRIP2, PLCG2, UHRF1, JAM3, FYN, CFLAR, TMOD1, RAP1GAP2, FAP, NEK7, IFRD1, CEP85, IL4R, CCT8, EI24, SYNJ1, IKBKB, CDH13, SCARB1, NBN, SEMA6C, WDR1, STON2, HCLS1, ADAMTS16, USP6NL, PLXNA2, SETX, ITGB1BP1, ATG7, PR…
INTERPRO	14	3.34928	0.000850934	397	218	18559	3.00217	0.516235	0.516235	1.30911	IPR011990:Tetratricopeptide-like helical	CDC23, FKBP5, NAPB, WDTC1, HELZ, UNC45B, P3H1, KDM6A, SEL1L3, PDCD11, INTS8, NRDE2, CLUH, TOMM34
GOTERM_MF_FAT	34	8.13397	0.000861769	338	846	15478	1.84038	0.592056	0.258348	1.35964	GO:0008092~cytoskeletal protein binding	CTNNA3, RTCB, TNNT1, CLASP2, STARD9, SIRT2, ACE, WDR1, HCLS1, AFAP1, MYOZ2, MYBPC2, MYH8, OPA1, ANTXR1, MYO10, PPARG, KIF9, ARPC2, VASP, MYBPC1, TPM3, SNTB1, FYN, MID2, KLHL5, TMOD1, NDEL1, FBXO25, MYH3, TUBGCP5, SPTAN1, KIF24, DNM2
GOTERM_BP_FAT	7	1.67464	0.00105484	368	53	16650	5.9757	0.992093	0.701807	1.97054	GO:0030239~myofibril assembly	MYLK3, CFLAR, TMOD1, MYH3, MYOZ2, KLHL41, WDR1
GOTERM_BP_FAT	61	14.5933	0.00122938	368	1840	16650	1.49996	0.996452	0.676411	2.29302	GO:0044093~positive regulation of molecular function	EGF, ACSL1, CYFIP2, LMF1, SIRT2, ACE, MASTL, STAT3, CTHRC1, WNK2, ANTXR1, ARHGEF12, KIDINS220, RALGAPA2, PPARG, RGSL1, CDC23, CALCR, BAZ1B, PLCG2, PSMB2, UHRF1, CCNK, MMD, FYN, CFLAR, RAP1GAP2, PRKAR1B, NEK7, OSBPL8, ITGA6, IKBKB, SCARB1, DSTYK, NBN, ARFGEF3, RFC2, USP6NL, ARHGAP31, CD44, ITGB1BP1, TAF12, RBCK1, ABHD5, RAB4A, OCRL, GRTP1, CTSS, CASP9, KRAS, DIABLO, DENND5B, MID2, NDEL1, VLDLR, SP…
INTERPRO	13	3.11005	0.00169174	397	207	18559	2.93587	0.764084	0.514288	2.58688	IPR003961:Fibronectin, type III	IFNGR2, MYBPC1, LEPR, IL31RA, FSD2, IL13RA1, MID2, PTPRB, FSD1L, MYBPC2, FNDC1, IL4R, TNC
GOTERM_BP_FAT	23	5.50239	0.00181107	368	502	16650	2.07296	0.999755	0.749806	3.36054	GO:0022411~cellular component disassembly	KIF9, SYNJ1, NAPB, CLASP2, TFIP11, CTSS, ATG4D, LAMA3, HK2, MRPL2, WDR1, LAMC1, EIF2D, TMOD1, SETX, CD44, FAP, NDEL1, OGFOD1, SPTAN1, KIF24, MTRF1L, NUP85
GOTERM_BP_FAT	28	6.69856	0.00204058	368	672	16650	1.88519	0.999915	0.737692	3.77869	GO:0030029~actin filament-based process	CTNNA3, IKBKB, CLASP2, TNNT1, EHD2, KLHL41, WDR1, HCLS1, ITGB1BP1, MYOZ2, MYBPC2, MYH8, ANTXR1, MYLK3, ARPC2, VASP, MYBPC1, TPM3, KRAS, JAM3, CFLAR, TMOD1, MYH3, SPTAN1, KCNQ1, KIT, ARHGEF15, MYL6
GOTERM_BP_FAT	8	1.91388	0.00205023	368	81	16650	4.4686	0.999918	0.691645	3.79624	GO:0034446~substrate adhesion-dependent cell spreading	LAMC1, ARPC2, ITGB1BP1, POSTN, DNM2, ANTXR1, PEAK1, LAMB1
GOTERM_BP_FAT	6	1.43541	0.00220381	368	42	16650	6.46351	0.99996	0.675089	4.07505	GO:0010883~regulation of lipid storage	SCARB1, OSBPL8, ACACB, SREBF2, ABHD5, PPARG
GOTERM_MF_DIRECT	10	2.39234	0.0022212	364	132	16881	3.51336	0.775596	0.775596	3.28011	GO:0051015~actin filament binding	TMOD1, ARPC2, CTNNA3, CLASP2, MYH3, TPM3, MYH8, ANTXR1, WDR1, MYO10
GOTERM_MF_FAT	10	2.39234	0.00240466	338	132	15478	3.46916	0.918231	0.465255	3.75074	GO:0051015~actin filament binding	TMOD1, ARPC2, CTNNA3, CLASP2, MYH3, TPM3, MYH8, ANTXR1, WDR1, MYO10
GOTERM_BP_FAT	25	5.98086	0.00252115	368	583	16650	1.94016	0.999991	0.685779	4.64871	GO:0048589~developmental growth	PALB2, PLXNA4, CLASP2, TYMS, WDTC1, NBN, LEPR, ACACB, SEMA6C, GPAM, KDM6A, PLXNA2, CFLAR, NDEL1, COL27A1, STAT3, IFRD1, POSTN, DNM2, RTF1, CPQ, YBX3, IQGAP1, TNC, SEMA5B
GOTERM_BP_FAT	10	2.39234	0.00262032	368	132	16650	3.42762	0.999994	0.665081	4.82732	GO:0030048~actin filament-based movement	TMOD1, CTNNA3, TNNT1, MYH3, MYBPC1, TPM3, KCNQ1, MYBPC2, MYH8, MYL6
GOTERM_CC_FAT	103	24.6411	0.00334052	343	3399	14527	1.28342	0.871415	0.289553	4.83563	GO:0005829~cytosol	ANKRA2, TYMS, EHD2, NUFIP1, ATG4D, EXOC6, PAIP1, STAT3, SREBF2, KARS, ARHGEF12, KIDINS220, MYO10, MYLK3, ARPC2, VASP, WDTC1, MYBPC1, TPM3, PLCG2, PSMB2, EXOSC7, AMD1, TOP3A, EIF2D, CFLAR, RAP1GAP2, PRKAR1B, EIF3K, TUBGCP5, NUP85, CCT8, SYNJ1, WSB1, TNNT1, NBN, DSTYK, CEP164, WDR1, ITGB1BP1, RBCK1, ATG7, EIF3D, OCRL, CAST, CASP9, GCC2, DIABLO, HK2, HAGH, IQGAP1, SRP68, CLASP2, CYFIP2, SIRT2, GRK4,…
GOTERM_BP_FAT	12	2.87081	0.00362622	368	192	16650	2.82779	1	0.750511	6.62116	GO:0034329~cell junction assembly	MPP5, LAMC1, LIMS2, IKBKB, VASP, CLASP2, ITGB1BP1, ACE, ITGA6, LAMA3, IQGAP1, WDR1
GOTERM_BP_FAT	14	3.34928	0.00363605	368	249	16650	2.54387	1	0.723356	6.63853	GO:0034330~cell junction organization	LIMS2, IKBKB, CLASP2, VASP, CDH13, ACE, CTNND1, LAMA3, WDR1, LAMC1, MPP5, ITGB1BP1, ITGA6, IQGAP1
GOTERM_CC_DIRECT	137	32.7751	0.00367448	390	5222	18224	1.22592	0.776483	0.312413	5.01734	GO:0005737~cytoplasm	TNPO3, FBXO38, TYMS, ANKRA2, IGF2R, ATG4D, KLHL41, RNF14, POLA1, BMP6, PAIP1, OGFOD1, AFAP1, STAT3, PDLIM1, CTHRC1, BOLL, CLUH, SREBF2, UBE2K, KARS, ARHGEF12, MYO10, MYLK3, ARPC2, VASP, SETD6, SYMPK, NAPEPLD, STRIP2, PSMB2, XPC, CFLAR, EIF2D, KLHL5, FAP, RAP1GAP2, AMACR, IFRD1, EIF3K, TUBGCP5, CEP85, KCNQ1, CCT8, NPAS3, POLR1A, CTNNA3, CDH13, SCARB1, DSTYK, WDR1, PAPD5, SLC39A11, ITGB1BP1, ATG7, …
GOTERM_BP_FAT	8	1.91388	0.00372429	368	90	16650	4.02174	1	0.705433	6.79433	GO:0030516~regulation of axon extension	PLXNA2, PLXNA4, NDEL1, CLASP2, IFRD1, SEMA6C, DNM2, SEMA5B
GOTERM_CC_FAT	49	11.7225	0.00379073	343	1379	14527	1.50492	0.902523	0.282936	5.4704	GO:0030054~cell junction	SRP68, SLC5A1, CLASP2, IGF2R, CYFIP2, DTNA, SIRT2, CTNND1, MPP5, CLINT1, CD99L2, PDLIM1, AFAP1, YBX3, PEAK1, ARPC2, VASP, SYMPK, IL31RA, JAM3, CHRNG, ZC3HAV1, FAP, ITGA6, CCT8, LIMS2, CTNNA3, CDH13, DSTYK, STON2, WDR1, ARHGAP31, CLMP, CD44, ITGB1BP1, SYT9, TNC, CAST, KRAS, SNTB1, UBN1, EIF2A, PAK4, GOLGA3, ANXA5, SPTAN1, KIT, DNM2, IQGAP1
GOTERM_MF_FAT	50	11.9617	0.00386009	338	1531	15478	1.49552	0.982088	0.552668	5.95641	GO:0032559~adenyl ribonucleotide binding	ACSF3, ACSL1, EHD2, GRK4, MASTL, GRK7, DDX47, MYH8, WNK2, MCM8, UBE2K, KARS, PEAK1, MYO10, MYLK3, KIF9, BAZ1B, FYN, PRKAR1B, NEK7, MYH3, RBKS, KIF24, HCN1, CCT8, RTCB, IKBKB, DHX30, DSTYK, ZRANB3, STARD9, ACACB, PNPLA8, RFC2, AARSD1, SETX, TK2, KRAS, HELZ, PAK4, HK2, ABCA8, CDKL1, HK1, RTCA, PEX1, KIT, SRPK3, ALPK3, ABCC10
GOTERM_CC_FAT	7	1.67464	0.00387654	343	64	14527	4.63233	0.907536	0.257414	5.59093	GO:0005657~replication fork	POLA1, NBN, BAZ1B, ZRANB3, PRIM2, UHRF1, RFC2
GOTERM_BP_DIRECT	5	1.19617	0.00400173	370	30	16792	7.56396	0.999208	0.971864	6.57459	GO:0044344~cellular response to fibroblast growth factor stimulus	SETX, CD44, ITGB1BP1, DSTYK, POSTN
GOTERM_BP_FAT	11	2.63158	0.00415191	368	168	16650	2.96244	1	0.719735	7.54584	GO:0031099~regeneration	CFLAR, MATN2, NDEL1, TYMS, IFRD1, POSTN, IGF2R, CPQ, JAM3, TNC, PPARG
GOTERM_BP_FAT	32	7.6555	0.00429869	368	851	16650	1.70132	1	0.709098	7.80248	GO:0060284~regulation of cell development	SYNJ1, IKBKB, FBXO38, CLASP2, SEMA6C, SIRT2, WDR1, PLXNA2, BMP6, SETX, ITGB1BP1, STAT3, OPA1, PALM, KIDINS220, SEMA5B, PPARG, MYLK3, PLXNA4, ARPC2, SLC9B2, MMD, FYN, RAP1GAP2, NDEL1, IFRD1, VLDLR, POSTN, TCF7L2, KIT, DNM2, IQGAP1
GOTERM_CC_DIRECT	4	0.956938	0.00439512	390	16	18224	11.6821	0.8335	0.301312	5.97351	GO:0032982~myosin filament	MYH3, MYBPC1, MYBPC2, MYH8
GOTERM_MF_FAT	50	11.9617	0.00444871	338	1542	15478	1.48485	0.990313	0.538295	6.83493	GO:0030554~adenyl nucleotide binding	ACSF3, ACSL1, EHD2, GRK4, MASTL, GRK7, DDX47, MYH8, WNK2, MCM8, UBE2K, KARS, PEAK1, MYO10, MYLK3, KIF9, BAZ1B, FYN, PRKAR1B, NEK7, MYH3, RBKS, KIF24, HCN1, CCT8, RTCB, IKBKB, DHX30, DSTYK, ZRANB3, STARD9, ACACB, PNPLA8, RFC2, AARSD1, SETX, TK2, KRAS, HELZ, PAK4, HK2, ABCA8, CDKL1, HK1, RTCA, PEX1, KIT, SRPK3, ALPK3, ABCC10
GOTERM_BP_FAT	22	5.26316	0.00457693	368	509	16650	1.95556	1	0.7099	8.28711	GO:0009894~regulation of catabolic process	EGF, CDC23, SCARB1, ACACB, PSMB2, ECD, SIRT2, SPTLC2, UBAC2, RNF14, CREBRF, RNF144B, FYN, ZC3HAV1, PDE3B, FAP, STAT3, MDM4, ATG7, UBE2K, ABHD5, UCHL5
GOTERM_BP_DIRECT	3	0.717703	0.00460898	370	5	16792	27.2303	0.999733	0.935592	7.53597	GO:0010891~negative regulation of sequestering of triglyceride	OSBPL8, ABHD5, PPARG
GOTERM_BP_FAT	3	0.717703	0.00463656	368	5	16650	27.1467	1	0.69396	8.39065	GO:0010891~negative regulation of sequestering of triglyceride	OSBPL8, ABHD5, PPARG
GOTERM_BP_FAT	11	2.63158	0.00509843	368	173	16650	2.87682	1	0.708801	9.18895	GO:0008361~regulation of cell size	PLXNA2, PLXNA4, RAP1GAP2, NDEL1, CLASP2, WDTC1, IFRD1, SLC12A2, SEMA6C, DNM2, SEMA5B
GOTERM_BP_FAT	12	2.87081	0.00510693	368	201	16650	2.70117	1	0.690878	9.20358	GO:0071897~DNA biosynthetic process	PALB2, POLA1, TOP3A, NEK7, TYMS, NBN, PRIM2, RFC2, TK2, PAPD5, CCT8, PPARG
GOTERM_CC_DIRECT	4	0.956938	0.0052533	390	17	18224	10.9949	0.882783	0.300429	7.10051	GO:0031527~filopodium membrane	VASP, PALM, ANTXR1, MYO10
GOTERM_MF_FAT	29	6.9378	0.00526136	338	766	15478	1.73367	0.995857	0.54331	8.03517	GO:0032403~protein complex binding	CTNNA3, CLASP2, WDR1, HCLS1, P3H1, CD44, ITGB1BP1, MYH8, ANTXR1, MYO10, LMBRD1, ARPC2, CTSB, CTSS, TPM3, KRAS, UHRF1, JAM3, FYN, CFLAR, TMOD1, FAP, NDEL1, PEX1, MYH3, DNM2, ITGA6, IQGAP1, UCHL5
GOTERM_BP_FAT	8	1.91388	0.0053138	368	96	16650	3.77038	1	0.687618	9.55894	GO:0035383~thioester metabolic process	ACSF3, ACSL1, GPAM, ACACB, FAR2, DLST, HSD17B4, ELOVL7
GOTERM_BP_FAT	8	1.91388	0.0053138	368	96	16650	3.77038	1	0.687618	9.55894	GO:0006637~acyl-CoA metabolic process	ACSF3, ACSL1, GPAM, ACACB, FAR2, DLST, HSD17B4, ELOVL7
GOTERM_BP_FAT	10	2.39234	0.00533957	368	147	16650	3.07786	1	0.672426	9.60311	GO:0031032~actomyosin structure organization	MYLK3, CFLAR, TMOD1, CLASP2, ITGB1BP1, MYH3, MYOZ2, KLHL41, WDR1, ARHGEF15
GOTERM_MF_DIRECT	48	11.4833	0.00535217	364	1495	16881	1.48901	0.972848	0.835222	7.73345	GO:0005524~ATP binding	RTCB, IKBKB, ACSF3, DHX30, DSTYK, ZRANB3, ACSL1, STARD9, ACACB, EHD2, PNPLA8, RFC2, GRK4, AARSD1, SETX, MASTL, GRK7, DDX47, WNK2, MYH8, MCM8, KARS, UBE2K, TK2, PEAK1, MYO10, MYLK3, KIF9, BAZ1B, KRAS, HELZ, PAK4, HK2, ABCA8, FYN, CDKL1, HK1, RTCA, PEX1, NEK7, MYH3, RBKS, KIF24, SRPK3, KIT, ALPK3, ABCC10, CCT8
GOTERM_BP_FAT	17	4.06699	0.005476	368	354	16650	2.17276	1	0.665416	9.83664	GO:0032535~regulation of cellular component size	PLXNA4, ARPC2, CLASP2, VASP, WDTC1, SEMA6C, WDR1, HCLS1, PLXNA2, TMOD1, RAP1GAP2, NDEL1, IFRD1, SPTAN1, SLC12A2, DNM2, SEMA5B
GOTERM_BP_DIRECT	8	1.91388	0.0055319	370	97	16792	3.74299	0.999949	0.915408	8.97931	GO:0006396~RNA processing	SETX, RTCA, TFIP11, SSB, DHX30, NOVA1, NUFIP1, HNRNPDL
GOTERM_BP_FAT	4	0.956938	0.00574064	368	17	16650	10.6458	1	0.667162	10.288	GO:0002183~cytoplasmic translational initiation	EIF2D, SSB, CDC123, EIF3D
GOTERM_MF_FAT	67	16.0287	0.00576922	338	2241	15478	1.36909	0.997564	0.528658	8.7779	GO:0097367~carbohydrate derivative binding	CLASP2, ACSF3, ACSL1, IGF2R, EHD2, GRK4, RAB2B, POLA1, MASTL, GRK7, DDX47, WNK2, MYH8, LMAN2, MCM8, KARS, UBE2K, PEAK1, MYO10, MYLK3, KIF9, BAZ1B, RSPO3, FYN, NIN, PRKAR1B, NEK7, MYH3, RBKS, KIF24, HCN1, CCT8, RTCB, IKBKB, SCARB1, DHX30, ZRANB3, DSTYK, STARD9, ACACB, PNPLA8, RFC2, AARSD1, SETX, CD44, OPA1, TK2, RAB4A, CTSB, CTSS, KRAS, HELZ, PAK4, PLEKHA8, HK2, ABCA8, CDKL1, HK1, RTCA, PEX1, VLDL…
GOTERM_BP_FAT	6	1.43541	0.00610664	368	53	16650	5.12203	1	0.674905	10.9087	GO:0002181~cytoplasmic translation	EIF2D, SSB, CDC123, YBX3, EIF3D, MRPL2
GOTERM_BP_FAT	75	17.9426	0.00641609	368	2541	16650	1.33544	1	0.678689	11.4303	GO:0051641~cellular localization	EGF, SRP68, F8, TNPO3, CTDSPL2, SSB, CLASP2, TM9SF4, EHD2, LMF1, ATG4D, SLBP, MPP5, BMP6, TMED7, SLMAP, STAT3, LMAN2, CLUH, SREBF2, PALM, MYO10, CDC23, NAPB, SEC16B, CALCR, MYBPC1, PLCG2, SRRM1, MCOLN1, FYN, EIF2D, NIN, ZDHHC3, OSBPL8, TOMM34, NUP85, IL4R, CCT8, SYNJ1, IKBKB, CDH13, STARD9, ACACB, UBAC2, TPCN1, STON2, HCLS1, C5orf42, USP6NL, BUD13, PLXNA2, THOC5, ITGB1BP1, COPB1, COG1, PRELID3A, …
GOTERM_MF_FAT	48	11.4833	0.00644427	338	1495	15478	1.47027	0.998798	0.526253	9.75642	GO:0005524~ATP binding	RTCB, IKBKB, ACSF3, DHX30, DSTYK, ZRANB3, ACSL1, STARD9, ACACB, EHD2, PNPLA8, RFC2, GRK4, AARSD1, SETX, MASTL, GRK7, DDX47, WNK2, MYH8, MCM8, KARS, UBE2K, TK2, PEAK1, MYO10, MYLK3, KIF9, BAZ1B, KRAS, HELZ, PAK4, HK2, ABCA8, FYN, CDKL1, HK1, RTCA, PEX1, NEK7, MYH3, RBKS, KIF24, SRPK3, KIT, ALPK3, ABCC10, CCT8
GOTERM_BP_FAT	44	10.5263	0.00655049	368	1321	16650	1.50701	1	0.672502	11.656	GO:0032989~cellular component morphogenesis	CLASP2, CEP164, SEMA6C, KLHL41, WDR1, C5orf42, ADAMTS16, USP6NL, MPP5, PLXNA2, MATN2, ITGB1BP1, MYOZ2, ANTXR1, CEP295, PALM, KIDINS220, PEAK1, MYO10, LAMB1, SEMA5B, MYLK3, PLXNA4, OCRL, ARPC2, VASP, CASP9, KRAS, STRIP2, FYN, LAMC1, CFLAR, TMOD1, NDEL1, MYH3, IFRD1, VLDLR, KIF24, SPTAN1, POSTN, TCF7L2, KIT, DNM2, IQGAP1
GOTERM_BP_FAT	84	20.0957	0.00676949	368	2914	16650	1.30424	1	0.671269	12.0225	GO:0044085~cellular component biogenesis	EGF, F8, TFIP11, CLASP2, ANKRA2, TM9SF4, NUFIP1, ATG4D, SIRT2, ACE, KLHL41, TIMMDC1, MPP5, CLINT1, RPP40, OGFOD1, DDX47, WDR12, UBE2K, PALM, CEP295, ANTXR1, MYO10, MYLK3, KIF9, ARPC2, SEC16B, VASP, NAPB, XPC, EXOSC7, LAMA3, CFLAR, EIF2D, NIN, TMOD1, NEK7, MCU, MYH3, EIF3K, TUBGCP5, MDM4, KIF24, RPF1, NDUFA10, WDR3, NUP85, ITGA6, CCT8, LIMS2, SYNJ1, IKBKB, CDH13, DHX30, CDC123, STARD9, CEP164, ACA…
GOTERM_CC_DIRECT	7	1.67464	0.00683258	390	79	18224	4.14047	0.938603	0.32876	9.14176	GO:0005604~basement membrane	LAMC1, MATN2, FREM2, ITGA6, LAMA3, TNC, LAMB1
GOTERM_BP_FAT	16	3.82775	0.00685537	368	331	16650	2.18705	1	0.663052	12.1658	GO:0006936~muscle contraction	CTNNA3, TNNT1, MYBPC1, TPM3, SNTB1, DTNA, KLHL41, GRIP2, CHRNG, TMOD1, SLMAP, MYH3, KCNQ1, MYBPC2, MYH8, MYL6
GOTERM_CC_FAT	4	0.956938	0.00688278	343	17	14527	9.96536	0.985502	0.375257	9.7245	GO:0031527~filopodium membrane	VASP, PALM, ANTXR1, MYO10
GOTERM_BP_FAT	50	11.9617	0.00708072	368	1559	16650	1.45108	1	0.662522	12.5409	GO:0043085~positive regulation of catalytic activity	EGF, SCARB1, ARFGEF3, NBN, ACSL1, DSTYK, CYFIP2, LMF1, ACE, RFC2, USP6NL, ARHGAP31, CD44, MASTL, STAT3, ITGB1BP1, ABHD5, ARHGEF12, ANTXR1, KIDINS220, PPARG, RALGAPA2, RGSL1, RAB4A, OCRL, CDC23, GRTP1, CALCR, CASP9, KRAS, PSMB2, UHRF1, DIABLO, CCNK, MMD, DENND5B, FYN, CFLAR, RAP1GAP2, NDEL1, PRKAR1B, NEK7, VLDLR, OSBPL8, SPTAN1, DNM2, KIT, IQGAP1, ITGA6, ARHGEF15
GOTERM_BP_FAT	16	3.82775	0.00744665	368	334	16650	2.1674	1	0.669036	13.1467	GO:0030198~extracellular matrix organization	KIF9, CLASP2, CTSS, JAM3, LAMA3, PRDX4, LAMC1, CD44, FAP, COL27A1, POSTN, ANTXR1, ITGA6, OLFML2A, LAMB1, TNC
GOTERM_MF_FAT	15	3.58852	0.00755372	338	307	15478	2.23744	0.999624	0.545505	11.3433	GO:0045296~cadherin binding	CTNNA3, CAST, CDH13, VASP, EIF2A, PAK4, CTNND1, GOLGA3, CLINT1, ZC3HAV1, PDLIM1, SPTAN1, ITGA6, IQGAP1, CCT8
GOTERM_BP_FAT	16	3.82775	0.00764885	368	335	16650	2.16093	1	0.667259	13.4798	GO:0043062~extracellular structure organization	KIF9, CLASP2, CTSS, JAM3, LAMA3, PRDX4, LAMC1, CD44, FAP, COL27A1, POSTN, ANTXR1, ITGA6, OLFML2A, LAMB1, TNC
GOTERM_BP_FAT	4	0.956938	0.00791848	368	19	16650	9.52517	1	0.668726	13.922	GO:0001832~blastocyst growth	PALB2, NDEL1, NBN, RTF1
GOTERM_BP_DIRECT	10	2.39234	0.00796521	370	157	16792	2.89069	0.999999	0.942073	12.6837	GO:0006629~lipid metabolic process	PAFAH1B2, CEPT1, OCRL, FADS3, PLCG2, PNPLA8, SREBF2, FAR2, ABHD5, PPARG
GOTERM_BP_FAT	8	1.91388	0.00816408	368	104	16650	3.48035	1	0.669024	14.323	GO:0061387~regulation of extent of cell growth	PLXNA2, PLXNA4, NDEL1, CLASP2, IFRD1, SEMA6C, DNM2, SEMA5B
GOTERM_BP_FAT	15	3.58852	0.0081936	368	306	16650	2.21787	1	0.659731	14.371	GO:0031589~cell-substrate adhesion	ARPC2, CLASP2, CDH13, JAM3, LAMC1, CD44, BCAM, ITGB1BP1, POSTN, DNM2, ANTXR1, ITGA6, IQGAP1, PEAK1, LAMB1
GOTERM_BP_FAT	23	5.50239	0.00838375	368	572	16650	1.81927	1	0.657847	14.6801	GO:0031344~regulation of cell projection organization	PLXNA4, ARPC2, FBXO38, CLASP2, SEMA6C, KLHL41, ADAMTS16, USP6NL, PLXNA2, FYN, SETX, RAP1GAP2, NDEL1, IFRD1, VLDLR, DNM2, KIT, OPA1, PALM, IQGAP1, KIDINS220, SEMA5B, MYO10
GOTERM_BP_FAT	81	19.378	0.00852689	368	2817	16650	1.30096	1	0.654031	14.912	GO:0033036~macromolecule localization	EGF, SRP68, TNPO3, CTDSPL2, SSB, CLASP2, TM9SF4, ACSL1, EHD2, LMF1, ATG4D, ACE, EXOC6, SLBP, RAB2B, MPP5, BMP6, TMED7, SLMAP, STAT3, LMAN2, SREBF2, PALM, PPARG, SEC16B, NAPB, CALCR, MYBPC1, GPAM, SRRM1, MCOLN1, FYN, EIF2D, MCU, ZDHHC3, OSBPL8, HCN1, TOMM34, NUP85, IL4R, CCT8, IKBKB, SCARB1, ACACB, PNPLA8, UBAC2, GRIP2, HCLS1, P3H1, C5orf42, USP6NL, BUD13, THOC5, ITGB1BP1, COPB1, COG1, ATG7, PRELI…
GOTERM_BP_FAT	76	18.1818	0.00897089	368	2618	16650	1.31344	1	0.662952	15.6277	GO:0022607~cellular component assembly	EGF, F8, TFIP11, CLASP2, TM9SF4, NUFIP1, ATG4D, SIRT2, ACE, KLHL41, TIMMDC1, MPP5, CLINT1, OGFOD1, UBE2K, PALM, CEP295, ANTXR1, MYO10, MYLK3, KIF9, ARPC2, VASP, NAPB, SEC16B, XPC, LAMA3, CFLAR, EIF2D, NIN, TMOD1, NEK7, MCU, MYH3, EIF3K, TUBGCP5, MDM4, KIF24, RPF1, NDUFA10, NUP85, ITGA6, CCT8, LIMS2, SYNJ1, IKBKB, CDH13, DHX30, CDC123, STARD9, CEP164, ACACB, WDR1, HCLS1, C5orf42, ADAMTS16, USP6NL,…
GOTERM_BP_DIRECT	8	1.91388	0.00933343	370	107	16792	3.39318	1	0.938177	14.7039	GO:0006936~muscle contraction	TMOD1, SLMAP, TPM3, SNTB1, MYBPC2, MYH8, MYL6, CHRNG
GOTERM_BP_FAT	61	14.5933	0.00981552	368	2021	16650	1.36562	1	0.686484	16.9734	GO:0045184~establishment of protein localization	EGF, SRP68, TNPO3, CTDSPL2, CLASP2, TM9SF4, LMF1, ATG4D, EXOC6, RAB2B, MPP5, BMP6, TMED7, STAT3, LMAN2, SREBF2, PALM, PPARG, NAPB, SEC16B, CALCR, MYBPC1, GPAM, MCOLN1, EIF2D, MCU, ZDHHC3, TOMM34, NUP85, IL4R, CCT8, IKBKB, UBAC2, GRIP2, HCLS1, P3H1, USP6NL, ITGB1BP1, COPB1, COG1, ATG7, RBCK1, PRELID3A, SYT9, NOX5, RAB4A, GRTP1, NECAP1, GCC2, SLC15A2, PLEKHA8, HK2, CREBRF, HK1, PPP2R5A, PEX1, NDEL1…
GOTERM_BP_FAT	6	1.43541	0.0102612	368	60	16650	4.52446	1	0.693496	17.6753	GO:0019915~lipid storage	SCARB1, OSBPL8, ACACB, SREBF2, ABHD5, PPARG
INTERPRO	6	1.43541	0.0103163	397	62	18559	4.52401	0.999856	0.947582	14.8299	IPR011705:BTB/Kelch-associated	KLHL5, KLHL13, KBTBD2, GMCL1, KLHL29, KLHL41
GOTERM_BP_FAT	4	0.956938	0.0105213	368	21	16650	8.61801	1	0.693667	18.0824	GO:0007020~microtubule nucleation	NIN, NDEL1, CLASP2, TUBGCP5
GOTERM_BP_FAT	4	0.956938	0.0105213	368	21	16650	8.61801	1	0.693667	18.0824	GO:1901889~negative regulation of cell junction assembly	IKBKB, CLASP2, ITGB1BP1, ACE
GOTERM_BP_FAT	4	0.956938	0.0105213	368	21	16650	8.61801	1	0.693667	18.0824	GO:0070861~regulation of protein exit from endoplasmic reticulum	SEC16B, TM9SF4, GCC2, UBAC2
GOTERM_BP_FAT	12	2.87081	0.0107746	368	223	16650	2.43469	1	0.6936	18.4768	GO:0071826~ribonucleoprotein complex subunit organization	EIF2D, SETX, TFIP11, OGFOD1, DHX30, EIF3K, CDC123, AAR2, RPF1, NUFIP1, EIF2A, EIF3D
GOTERM_BP_FAT	20	4.78469	0.011035	368	483	16650	1.87348	1	0.693775	18.8806	GO:0010720~positive regulation of cell development	MYLK3, ARPC2, SYNJ1, FBXO38, SIRT2, SLC9B2, MMD, FYN, BMP6, SETX, NDEL1, VLDLR, DNM2, KIT, TCF7L2, OPA1, PALM, IQGAP1, KIDINS220, PPARG
GOTERM_BP_FAT	20	4.78469	0.0112852	368	484	16650	1.86961	1	0.693614	19.2667	GO:0090066~regulation of anatomical structure size	PLXNA4, ARPC2, CLASP2, VASP, WDTC1, SEMA6C, ACE, GRIP2, WDR1, HCLS1, PLXNA2, TMOD1, RAP1GAP2, NDEL1, ITGB1BP1, IFRD1, SPTAN1, SLC12A2, DNM2, SEMA5B
GOTERM_CC_FAT	13	3.11005	0.0115247	343	240	14527	2.29411	0.99918	0.508634	15.777	GO:0030135~coated vesicle	F8, OCRL, LMBRD1, GPR107, NECAP1, IGF2R, STON2, CLINT1, TMED7, COPB1, DNM2, LMAN2, SREBF2
GOTERM_BP_DIRECT	11	2.63158	0.0115702	370	196	16792	2.54705	1	0.94823	17.912	GO:0030198~extracellular matrix organization	LAMC1, CD44, COL27A1, POSTN, JAM3, ITGA6, LAMA3, OLFML2A, PRDX4, TNC, LAMB1
GOTERM_BP_FAT	14	3.34928	0.0117856	368	288	16650	2.19939	1	0.70127	20.0337	GO:0032388~positive regulation of intracellular transport	EGF, CTDSPL2, SEC16B, TM9SF4, MYBPC1, HCLS1, CREBRF, BMP6, ITGB1BP1, RBCK1, PRELID3A, TCF7L2, SREBF2, IL4R
INTERPRO	15	3.58852	0.011838	397	331	18559	2.11849	0.999961	0.921096	16.8346	IPR015943:WD40/YVTN repeat-like-containing domain	PALB2, PLXNA4, WSB1, WDTC1, WSB2, SEMA6C, EIF2A, GTF3C2, WDR1, WDR82, PLXNA2, WDR26, WDR12, WDR3, SEMA5B
GOTERM_MF_DIRECT	15	3.58852	0.0122268	364	329	16881	2.11442	0.999743	0.936435	16.8489	GO:0004842~ubiquitin-protein transferase activity	KBTBD2, KLHL13, CDC23, WSB1, RNF141, ZNRF3, UHRF1, KLHL41, RNF14, RNF144B, KLHL5, FBXO25, RBCK1, KLHL29, UBE2K
GOTERM_BP_DIRECT	5	1.19617	0.0122461	370	41	16792	5.53461	1	0.935631	18.8589	GO:0032526~response to retinoic acid	BMP6, SYNJ1, IGF2R, GDAP2, PPARG
GOTERM_MF_DIRECT	5	1.19617	0.0123712	364	42	16881	5.521	0.999767	0.876477	17.031	GO:0008307~structural constituent of muscle	MYBPC1, TPM3, MYBPC2, MYH8, MYL6
GOTERM_BP_FAT	5	1.19617	0.012372	368	41	16650	5.51763	1	0.710943	20.9239	GO:0043687~post-translational protein modification	SUMF1, ATG7, ARSD, ATG4D, P3H1
GOTERM_MF_FAT	19	4.54545	0.0124378	338	461	15478	1.88734	0.999998	0.693737	18.0233	GO:0050839~cell adhesion molecule binding	CTNNA3, CAST, VASP, CDH13, EIF2A, PAK4, JAM3, CTNND1, GOLGA3, CLINT1, ZC3HAV1, FAP, ITGB1BP1, PDLIM1, SPTAN1, POSTN, ITGA6, IQGAP1, CCT8
GOTERM_MF_FAT	73	17.4641	0.012615	338	2571	15478	1.30023	0.999998	0.667212	18.2564	GO:0036094~small molecule binding	SSB, ACSF3, TYMS, ACSL1, IGF2R, EHD2, SIRT2, GRK4, PLOD1, RAB2B, POLA1, MASTL, GRK7, OGFOD1, DDX47, WNK2, MYH8, LMAN2, BOLL, MCM8, KARS, UBE2K, PEAK1, MYO10, MYLK3, KIF9, BAZ1B, UHRF1, FYN, NIN, PRKAR1B, NEK7, MYH3, RBKS, KIF24, OSBPL8, HCN1, CCT8, RTCB, SYNJ1, IKBKB, DHX30, ZRANB3, DSTYK, STARD9, ACACB, PNPLA8, RFC2, HNRNPDL, P3H1, AARSD1, SETX, TRA2A, OPA1, NOX5, TK2, RAB4A, LMBRD1, KRAS, HELZ,…
GOTERM_MF_FAT	5	1.19617	0.0128893	338	42	15478	5.45154	0.999999	0.645785	18.6164	GO:0008307~structural constituent of muscle	MYBPC1, TPM3, MYBPC2, MYH8, MYL6
GOTERM_BP_FAT	7	1.67464	0.0131286	368	88	16650	3.599	1	0.724592	22.0585	GO:0022617~extracellular matrix disassembly	LAMC1, KIF9, CD44, FAP, CLASP2, CTSS, LAMA3
GOTERM_BP_FAT	38	9.09091	0.0134838	368	1151	16650	1.49374	1	0.726658	22.5858	GO:0048646~anatomical structure formation involved in morphogenesis	EGF, CDH13, CLASP2, CEP164, LEPR, EHD2, RORA, KLHL41, WDR1, C5orf42, KDM6A, MPP5, PLXNA2, PDE3B, ITGB1BP1, MYOZ2, CTHRC1, PTPRB, ETS2, NOX5, CEP295, LAMB1, PALB2, MYLK3, OCRL, VASP, CASP9, RSPO3, JAM3, LAMA3, CFLAR, TMOD1, FAP, MYH3, KIF24, RTF1, ITGA6, IL4R
GOTERM_BP_FAT	13	3.11005	0.0137088	368	262	16650	2.24496	1	0.725255	22.9181	GO:0032984~macromolecular complex disassembly	EIF2D, SYNJ1, TMOD1, SETX, TFIP11, OGFOD1, CLASP2, NAPB, KIF24, SPTAN1, MTRF1L, MRPL2, WDR1
GOTERM_BP_FAT	14	3.34928	0.0138199	368	294	16650	2.1545	1	0.720961	23.0816	GO:0010927~cellular component assembly involved in morphogenesis	MPP5, MYLK3, CFLAR, TMOD1, OCRL, CLASP2, MYH3, MYOZ2, CEP164, KIF24, CEP295, KLHL41, WDR1, C5orf42
KEGG_PATHWAY	9	2.15311	0.0139224	161	137	6910	2.81951	0.957936	0.957936	16.4096	hsa04530:Tight junction	MPP5, CTNNA3, MYH3, SYMPK, KRAS, MYH8, YBX3, JAM3, HCLS1
GOTERM_CC_FAT	3	0.717703	0.0140875	343	8	14527	15.8823	0.999833	0.546444	18.9541	GO:0043256~laminin complex	LAMC1, LAMA3, LAMB1
GOTERM_MF_DIRECT	211	50.4785	0.014207	364	8785	16881	1.11388	0.999933	0.853849	19.3142	GO:0005515~protein binding	F8, SSB, ANKRA2, TM9SF4, CCDC170, EHD2, RNF14, TIMMDC1, SLMAP, SREBF2, UBE2K, SLC22A3, ARPC2, MYBPC1, BAZ1B, TPM3, PLCG2, PSMB2, EXOSC7, XPC, NCOR2, CFLAR, FAP, INTS8, RAP1GAP2, PRKAR1B, KCNQ1, RPF1, NBN, CEP164, ITGB1BP1, ATG7, ETS2, EIF3D, PALB2, C11orf54, ZNRF3, HK2, PTGFRN, DIABLO, TDP1, UHRF1BP1, CREBRF, ALAS1, HAGH, KIT, SRPK3, RTF1, C1orf21, IQGAP1, SRP68, SLC5A1, CLASP2, GMCL1, SIRT2, DTN…
GOTERM_CC_FAT	4	0.956938	0.0142939	343	22	14527	7.7005	0.999853	0.52071	19.2052	GO:0032982~myosin filament	MYH3, MYBPC1, MYBPC2, MYH8
INTERPRO	7	1.67464	0.0146226	397	93	18559	3.51868	0.999997	0.918977	20.3891	IPR020472:G-protein beta WD-40 repeat	WSB1, WSB2, WDR26, WDR12, WDR3, WDR1, WDR82
GOTERM_MF_FAT	4	0.956938	0.0147548	338	24	15478	7.63215	1	0.668536	21.0245	GO:0071814~protein-lipid complex binding	CDH13, SCARB1, ANKRA2, VLDLR
GOTERM_MF_FAT	4	0.956938	0.0147548	338	24	15478	7.63215	1	0.668536	21.0245	GO:0071813~lipoprotein particle binding	CDH13, SCARB1, ANKRA2, VLDLR
GOTERM_CC_DIRECT	9	2.15311	0.0147885	390	149	18224	2.82251	0.997675	0.531389	18.8066	GO:0005741~mitochondrial outer membrane	HK1, ACSL1, GPAM, MAOA, ACACB, OPA1, AKAP1, TOMM34, HK2
GOTERM_MF_FAT	14	3.34928	0.0150351	338	301	15478	2.1299	1	0.650183	21.3804	GO:0098632~protein binding involved in cell-cell adhesion	CTNNA3, CAST, VASP, EIF2A, PAK4, CTNND1, GOLGA3, CLINT1, ZC3HAV1, PDLIM1, SPTAN1, ITGA6, IQGAP1, CCT8
KEGG_PATHWAY	7	1.67464	0.0151633	161	87	6910	3.45327	0.968354	0.822107	17.7445	hsa04512:ECM-receptor interaction	LAMC1, CD44, COL27A1, ITGA6, LAMA3, TNC, LAMB1
GOTERM_MF_FAT	10	2.39234	0.0155941	338	177	15478	2.58717	1	0.639983	22.086	GO:0003729~mRNA binding	SSB, THOC5, TYMS, NOVA1, PPP1R8, EIF2A, BOLL, CLUH, YBX3, SLBP
GOTERM_BP_FAT	25	5.98086	0.0165984	368	682	16650	1.65853	1	0.778001	27.0671	GO:0050767~regulation of neurogenesis	PLXNA4, SYNJ1, CLASP2, FBXO38, SEMA6C, SIRT2, WDR1, MMD, FYN, PLXNA2, BMP6, SETX, RAP1GAP2, NDEL1, STAT3, IFRD1, VLDLR, OPA1, DNM2, KIT, PALM, IQGAP1, KIDINS220, PPARG, SEMA5B
GOTERM_MF_FAT	14	3.34928	0.0170042	338	306	15478	2.0951	1	0.649782	23.8394	GO:0098631~protein binding involved in cell adhesion	CTNNA3, CAST, VASP, EIF2A, PAK4, CTNND1, GOLGA3, CLINT1, ZC3HAV1, PDLIM1, SPTAN1, ITGA6, IQGAP1, CCT8
GOTERM_CC_FAT	35	8.37321	0.0170626	343	990	14527	1.49732	0.999974	0.555813	22.5023	GO:0044429~mitochondrial part	ACSF3, SFXN4, TYMS, DHX30, ACSL1, ACACB, ATG4D, TIMMDC1, STAT3, PRELID3A, OPA1, KARS, ACO2, TK2, GPAM, MAOA, DIABLO, MRPL2, SLC9B2, HK2, ABCA8, D2HGDH, RNF144B, HAGH, HK1, ALAS1, MCU, LACTB2, NDUFA10, DNM2, MTRF1L, TOMM34, AKAP1, COX4I1, DLST
GOTERM_BP_FAT	70	16.7464	0.0173102	368	2448	16650	1.29376	1	0.785618	28.0561	GO:0008104~protein localization	EGF, SRP68, TNPO3, CTDSPL2, SSB, CLASP2, TM9SF4, EHD2, LMF1, ATG4D, EXOC6, RAB2B, MPP5, BMP6, TMED7, SLMAP, STAT3, LMAN2, SREBF2, PALM, PPARG, NAPB, SEC16B, CALCR, MYBPC1, GPAM, MCOLN1, FYN, EIF2D, MCU, ZDHHC3, OSBPL8, HCN1, TOMM34, NUP85, IL4R, CCT8, IKBKB, UBAC2, GRIP2, HCLS1, P3H1, C5orf42, USP6NL, ITGB1BP1, COPB1, COG1, ATG7, RBCK1, PRELID3A, SYT9, NOX5, RAB4A, GRTP1, NECAP1, GCC2, SLC15A2, P…
GOTERM_BP_FAT	42	10.0478	0.0179804	368	1330	16650	1.42878	1	0.791949	28.9758	GO:0006629~lipid metabolic process	EGF, PAFAH1B2, SYNJ1, ACSF3, SCARB1, ACSL1, LEPR, ACACB, LMF1, PNPLA8, ARSD, RORA, SIRT2, SPTLC2, HSD17B4, INPP4A, BMP6, CERS6, PDE3B, SUMF1, SREBF2, ABHD5, ELOVL7, PPARG, OCRL, FADS3, WDTC1, PLCG2, GPAM, NAPEPLD, BCO1, NCOR2, FYN, LPCAT2, CEPT1, PPP2R5A, AMACR, VLDLR, SGMS1, KIT, RETSAT, FAR2
GOTERM_CC_DIRECT	29	6.9378	0.0181984	390	862	18224	1.57206	0.999433	0.564191	22.649	GO:0005789~endoplasmic reticulum membrane	EI24, RTCB, FKBP5, IFNGR2, ACSL1, XYLT2, LMF1, PNPLA8, SPTLC2, UBAC2, KLHL41, PLOD1, RAB2B, CERS6, TMED7, COPB1, LMAN2, SREBF2, NOX5, ELOVL7, FADS3, PDIA6, SEC16B, PTGFRN, CEPT1, LPCAT2, OSBPL8, RETSAT, FAR2
GOTERM_BP_FAT	17	4.06699	0.0182534	368	405	16650	1.89915	1	0.790809	29.3472	GO:0003012~muscle system process	CTNNA3, TNNT1, MYBPC1, TPM3, SNTB1, DTNA, KLHL41, GRIP2, CHRNG, CFLAR, TMOD1, SLMAP, MYH3, KCNQ1, MYBPC2, MYH8, MYL6
GOTERM_MF_DIRECT	8	1.91388	0.0184506	364	125	16881	2.96809	0.999996	0.875788	24.3695	GO:0003729~mRNA binding	SSB, THOC5, TYMS, NOVA1, PPP1R8, EIF2A, CLUH, SLBP
GOTERM_CC_DIRECT	29	6.9378	0.0187416	390	863	18224	1.57024	0.999547	0.536997	23.2453	GO:0005794~Golgi apparatus	EI24, CLASP2, TM9SF4, STARD9, LMF1, CLINT1, SLC39A11, TMED7, PDE3B, CD44, COPB1, COG1, LMAN2, PLAGL1, CPQ, PPARG, ARPC2, GPR107, GCC2, PAK4, JAM3, PTGFRN, MMD, GOLGA3, ZC3HAV1, GLT8D2, CEP85, ZDHHC3, DNM2
GOTERM_BP_DIRECT	4	0.956938	0.0188196	370	26	16792	6.98212	1	0.976709	27.5467	GO:0071897~DNA biosynthetic process	TYMS, PRIM2, TK2, PAPD5
KEGG_PATHWAY	8	1.91388	0.0193338	161	118	6910	2.90978	0.987872	0.770245	22.0882	hsa05145:Toxoplasmosis	LAMC1, IKBKB, IFNGR2, STAT3, CASP9, ITGA6, LAMA3, LAMB1
GOTERM_BP_FAT	11	2.63158	0.0194446	368	212	16650	2.3476	1	0.805494	30.9463	GO:0022618~ribonucleoprotein complex assembly	EIF2D, SETX, OGFOD1, DHX30, EIF3K, CDC123, AAR2, RPF1, NUFIP1, EIF2A, EIF3D
GOTERM_BP_DIRECT	5	1.19617	0.0194745	370	47	16792	4.82806	1	0.969882	28.3626	GO:0043647~inositol phosphate metabolic process	NUDT3, SYNJ1, OCRL, PLCG2, INPP4A
GOTERM_BP_FAT	15	3.58852	0.01973	368	342	16650	1.98441	1	0.804442	31.3244	GO:0010876~lipid localization	EGF, SCARB1, ACSL1, ACACB, PNPLA8, PLEKHA8, ACE, ABCA8, BMP6, VLDLR, OSBPL8, PRELID3A, SREBF2, ABHD5, PPARG
GOTERM_BP_FAT	41	9.80861	0.0201478	368	1301	16650	1.42585	1	0.805547	31.8742	GO:0030030~cell projection organization	CDH13, CLASP2, FBXO38, CEP164, SEMA6C, KLHL41, C5orf42, ADAMTS16, USP6NL, PLXNA2, SETX, MATN2, CTHRC1, OPA1, CEP295, PALM, KIDINS220, MYO10, TNC, LAMB1, SEMA5B, PLXNA4, OCRL, ARPC2, VASP, KRAS, PAK4, JAM3, FYN, RAP1GAP2, NDEL1, IFRD1, VLDLR, KIF24, SPTAN1, POSTN, KIT, DNM2, ITGA6, NUP85, IQGAP1
GOTERM_BP_FAT	27	6.45933	0.0202803	368	769	16650	1.58856	1	0.802107	32.0478	GO:0051960~regulation of nervous system development	EGF, SYNJ1, FBXO38, CLASP2, SEMA6C, SIRT2, WDR1, PLXNA2, BMP6, SETX, STAT3, OPA1, PALM, KIDINS220, SEMA5B, PPARG, PLXNA4, MMD, FYN, RAP1GAP2, NDEL1, IFRD1, VLDLR, KIT, DNM2, IQGAP1, ARHGEF15
GOTERM_MF_FAT	55	13.1579	0.0205706	338	1884	15478	1.33684	1	0.699082	28.1105	GO:0032555~purine ribonucleotide binding	ACSF3, ACSL1, EHD2, GRK4, RAB2B, MASTL, GRK7, DDX47, MYH8, WNK2, MCM8, UBE2K, KARS, PEAK1, MYO10, MYLK3, KIF9, BAZ1B, FYN, NIN, PRKAR1B, NEK7, MYH3, RBKS, KIF24, HCN1, CCT8, RTCB, IKBKB, DHX30, ZRANB3, DSTYK, STARD9, ACACB, PNPLA8, RFC2, AARSD1, SETX, OPA1, TK2, RAB4A, KRAS, HELZ, PAK4, HK2, ABCA8, CDKL1, HK1, RTCA, PEX1, DNM2, KIT, SRPK3, ALPK3, ABCC10
GOTERM_BP_FAT	44	10.5263	0.0205713	368	1420	16650	1.40194	1	0.801241	32.4274	GO:0032270~positive regulation of cellular protein metabolic process	EGF, CDC123, DSTYK, NBN, ACSL1, CYFIP2, SIRT2, ACE, HCLS1, RNF14, BMP6, PAIP1, CD44, MASTL, ITGB1BP1, STAT3, ATG7, BOLL, UBE2K, YBX3, ANTXR1, KIDINS220, PPARG, TNFRSF19, CDC23, SYMPK, CASP9, KRAS, IL31RA, PSMB2, UHRF1, DIABLO, CCNK, MMD, NCOR2, FYN, RNF144B, PRKAR1B, PPP2R5A, VLDLR, OSBPL8, KIT, RTF1, IQGAP1
GOTERM_BP_FAT	12	2.87081	0.0208886	368	246	16650	2.20705	1	0.800809	32.8389	GO:0051258~protein polymerization	NIN, TMOD1, ARPC2, NDEL1, VASP, CLASP2, TUBGCP5, SPTAN1, DNM2, OPA1, UBE2K, HCLS1
GOTERM_BP_FAT	23	5.50239	0.0209345	368	624	16650	1.66767	1	0.796191	32.8984	GO:0008610~lipid biosynthetic process	SYNJ1, OCRL, FADS3, ACSF3, SCARB1, WDTC1, ACSL1, PLCG2, GPAM, ACACB, PNPLA8, SPTLC2, HSD17B4, INPP4A, BCO1, BMP6, LPCAT2, CEPT1, CERS6, AMACR, SGMS1, ABHD5, ELOVL7
KEGG_PATHWAY	11	2.63158	0.0209609	161	206	6910	2.2918	0.991667	0.697863	23.7248	hsa04510:Focal adhesion	MYLK3, FYN, EGF, LAMC1, VASP, COL27A1, PAK4, ITGA6, LAMA3, TNC, LAMB1
GOTERM_CC_FAT	16	3.82775	0.0212013	343	355	14527	1.90886	0.999998	0.608706	27.1977	GO:0031252~cell leading edge	CTNNA3, ARPC2, CLASP2, VASP, KLHL41, CTNND1, ARHGAP31, FAP, NDEL1, ITGB1BP1, DNM2, ATF4, ANTXR1, PALM, IQGAP1, MYO10
GOTERM_BP_FAT	21	5.02392	0.0212062	368	553	16650	1.71815	1	0.795143	33.2486	GO:0030036~actin cytoskeleton organization	MYLK3, ARPC2, IKBKB, CLASP2, VASP, TPM3, KRAS, EHD2, JAM3, KLHL41, WDR1, HCLS1, CFLAR, TMOD1, ITGB1BP1, MYH3, MYOZ2, SPTAN1, KIT, ANTXR1, ARHGEF15
GOTERM_BP_FAT	17	4.06699	0.0212414	368	413	16650	1.86237	1	0.790471	33.2938	GO:0010975~regulation of neuron projection development	PLXNA4, CLASP2, FBXO38, SEMA6C, PLXNA2, FYN, SETX, RAP1GAP2, NDEL1, IFRD1, VLDLR, DNM2, OPA1, PALM, IQGAP1, KIDINS220, SEMA5B
GOTERM_BP_FAT	14	3.34928	0.0214468	368	312	16650	2.0302	1	0.788497	33.5573	GO:0006869~lipid transport	EGF, SCARB1, ACSL1, ACACB, PNPLA8, PLEKHA8, ACE, ABCA8, BMP6, VLDLR, OSBPL8, PRELID3A, SREBF2, PPARG
GOTERM_MF_FAT	17	4.06699	0.0215859	338	419	15478	1.85795	1	0.697139	29.2848	GO:0004842~ubiquitin-protein transferase activity	KBTBD2, KLHL13, CDC23, WSB1, RNF141, ZNRF3, UHRF1, KLHL41, RNF14, RNF144B, KLHL5, FBXO25, MDM4, RBCK1, KLHL29, UBE2K, FBXO30
GOTERM_CC_FAT	14	3.34928	0.0221453	343	294	14527	2.0168	0.999999	0.599553	28.2308	GO:0031253~cell projection membrane	SLC5A1, ARPC2, FAP, SCARB1, VASP, CLASP2, GRK7, NAPEPLD, DNM2, ATF4, PALM, GRK4, ANTXR1, MYO10
GOTERM_BP_FAT	5	1.19617	0.0225824	368	49	16650	4.61679	1	0.80042	34.9964	GO:0035337~fatty-acyl-CoA metabolic process	ACSF3, ACSL1, FAR2, HSD17B4, ELOVL7
GOTERM_BP_FAT	5	1.19617	0.0225824	368	49	16650	4.61679	1	0.80042	34.9964	GO:0030032~lamellipodium assembly	ARPC2, CDH13, DNM2, KIT, NUP85
GOTERM_MF_FAT	3	0.717703	0.022831	338	11	15478	12.489	1	0.699099	30.7002	GO:0046030~inositol trisphosphate phosphatase activity	SYNJ1, OCRL, INPP4A
INTERPRO	29	6.9378	0.0229465	397	879	18559	1.54232	1	0.963125	30.186	IPR027417:P-loop containing nucleoside triphosphate hydrolase	DHX30, ZRANB3, WSCD1, STARD9, EHD2, RFC2, ZNFX1, RAB2B, MPP5, SETX, DDX47, OPA1, MYH8, MCM8, TK2, LRRIQ1, MYO10, KIF9, RAB4A, KRAS, HELZ, ABCA8, PEX1, MYH3, KIF24, NDUFA10, DNM2, IQGAP1, ABCC10
GOTERM_BP_FAT	14	3.34928	0.0230083	368	315	16650	2.01087	1	0.801588	35.5285	GO:0006732~coenzyme metabolic process	HK1, ACSF3, TYMS, STAT3, ACSL1, GPAM, ACACB, ECD, FAR2, AMD1, DLST, HSD17B4, HK2, ELOVL7
GOTERM_MF_FAT	55	13.1579	0.0231744	338	1897	15478	1.32768	1	0.686888	31.086	GO:0017076~purine nucleotide binding	ACSF3, ACSL1, EHD2, GRK4, RAB2B, MASTL, GRK7, DDX47, MYH8, WNK2, MCM8, UBE2K, KARS, PEAK1, MYO10, MYLK3, KIF9, BAZ1B, FYN, NIN, PRKAR1B, NEK7, MYH3, RBKS, KIF24, HCN1, CCT8, RTCB, IKBKB, DHX30, ZRANB3, DSTYK, STARD9, ACACB, PNPLA8, RFC2, AARSD1, SETX, OPA1, TK2, RAB4A, KRAS, HELZ, PAK4, HK2, ABCA8, CDKL1, HK1, RTCA, PEX1, DNM2, KIT, SRPK3, ALPK3, ABCC10
GOTERM_BP_FAT	33	7.89474	0.0232111	368	1004	16650	1.48712	1	0.799608	35.7804	GO:0034622~cellular macromolecular complex assembly	EGF, SYNJ1, CLASP2, CDC123, DHX30, TM9SF4, NUFIP1, SIRT2, HCLS1, TIMMDC1, CLINT1, SETX, OGFOD1, TAF12, OPA1, UBE2K, EIF3D, ARPC2, VASP, UBN1, EIF2A, XPC, NIN, EIF2D, TMOD1, NDEL1, EIF3K, TUBGCP5, AAR2, SPTAN1, RPF1, NDUFA10, DNM2
GOTERM_BP_DIRECT	3	0.717703	0.0232328	370	11	16792	12.3774	1	0.977763	32.8798	GO:0033674~positive regulation of kinase activity	CD44, NBN, DSTYK
GOTERM_MF_DIRECT	13	3.11005	0.0234368	364	290	16881	2.07894	1	0.897379	29.9313	GO:0098641~cadherin binding involved in cell-cell adhesion	CAST, VASP, EIF2A, PAK4, CTNND1, GOLGA3, CLINT1, ZC3HAV1, PDLIM1, SPTAN1, ITGA6, IQGAP1, CCT8
GOTERM_MF_DIRECT	5	1.19617	0.0237808	364	51	16881	4.5467	1	0.867573	30.3006	GO:0000049~tRNA binding	SSB, EIF2A, NSUN2, KARS, AARSD1
GOTERM_MF_FAT	55	13.1579	0.0238077	338	1900	15478	1.32558	1	0.679882	31.7919	GO:0032553~ribonucleotide binding	ACSF3, ACSL1, EHD2, GRK4, RAB2B, MASTL, GRK7, DDX47, MYH8, WNK2, MCM8, UBE2K, KARS, PEAK1, MYO10, MYLK3, KIF9, BAZ1B, FYN, NIN, PRKAR1B, NEK7, MYH3, RBKS, KIF24, HCN1, CCT8, RTCB, IKBKB, DHX30, ZRANB3, DSTYK, STARD9, ACACB, PNPLA8, RFC2, AARSD1, SETX, OPA1, TK2, RAB4A, KRAS, HELZ, PAK4, HK2, ABCA8, CDKL1, HK1, RTCA, PEX1, DNM2, KIT, SRPK3, ALPK3, ABCC10
KEGG_PATHWAY	6	1.43541	0.02389	161	71	6910	3.62698	0.995766	0.664768	26.5914	hsa04520:Adherens junction	FYN, CTNNA3, PTPRB, TCF7L2, IQGAP1, CTNND1
GOTERM_MF_FAT	54	12.9187	0.0240521	338	1860	15478	1.32947	1	0.667418	32.0627	GO:0001882~nucleoside binding	ACSF3, ACSL1, EHD2, GRK4, RAB2B, POLA1, MASTL, GRK7, DDX47, MYH8, WNK2, MCM8, UBE2K, KARS, PEAK1, MYO10, MYLK3, KIF9, BAZ1B, FYN, NIN, NEK7, MYH3, RBKS, KIF24, CCT8, RTCB, IKBKB, DHX30, ZRANB3, DSTYK, STARD9, ACACB, PNPLA8, RFC2, AARSD1, SETX, OPA1, TK2, RAB4A, KRAS, HELZ, PAK4, HK2, ABCA8, CDKL1, HK1, RTCA, PEX1, DNM2, KIT, SRPK3, ALPK3, ABCC10
GOTERM_BP_FAT	79	18.8995	0.0242142	368	2863	16650	1.24845	1	0.80855	37.0127	GO:0065009~regulation of molecular function	EGF, TFIP11, ACSL1, LEPR, CYFIP2, LMF1, SIRT2, ACE, MASTL, SLMAP, STAT3, CTHRC1, WNK2, PALM, ANTXR1, ARHGEF12, KIDINS220, RALGAPA2, PPARG, RGSL1, CDC23, WDTC1, SETD6, CALCR, BAZ1B, PLCG2, PSMB2, UHRF1, CCNK, MMD, FYN, CFLAR, ZC3HAV1, RAP1GAP2, PRKAR1B, NEK7, OSBPL8, KCNQ1, CEP85, ITGA6, PPP2R5E, IKBKB, SCARB1, ARFGEF3, DSTYK, NBN, ACACB, RFC2, USP6NL, ARHGAP31, CD44, ITGB1BP1, TAF12, RBCK1, ABHD5…
GOTERM_CC_FAT	6	1.43541	0.0244544	343	70	14527	3.63024	1	0.6127	30.7007	GO:0016459~myosin complex	MYH3, MYBPC1, MYBPC2, MYH8, MYO10, MYL6
GOTERM_CC_FAT	7	1.67464	0.0246289	343	95	14527	3.12073	1	0.593109	30.8841	GO:0005604~basement membrane	LAMC1, MATN2, FREM2, ITGA6, LAMA3, TNC, LAMB1
GOTERM_MF_FAT	5	1.19617	0.0247341	338	51	15478	4.4895	1	0.662196	32.8125	GO:0000049~tRNA binding	SSB, EIF2A, NSUN2, KARS, AARSD1
GOTERM_MF_FAT	7	1.67464	0.0250357	338	103	15478	3.11214	1	0.651718	33.1417	GO:0001948~glycoprotein binding	FYN, CLASP2, CTSB, VLDLR, CTSS, IGF2R, LMAN2
GOTERM_BP_DIRECT	4	0.956938	0.025206	370	29	16792	6.25983	1	0.977381	35.1428	GO:0045214~sarcomere organization	MYLK3, MYH3, KLHL41, WDR1
GOTERM_BP_FAT	4	0.956938	0.0254049	368	29	16650	6.24063	1	0.819193	38.4464	GO:0043030~regulation of macrophage activation	SLC7A2, IL31RA, RORA, IL4R
GOTERM_MF_FAT	13	3.11005	0.0254467	338	290	15478	2.05279	1	0.643365	33.5878	GO:0098641~cadherin binding involved in cell-cell adhesion	CAST, VASP, EIF2A, PAK4, CTNND1, GOLGA3, CLINT1, ZC3HAV1, PDLIM1, SPTAN1, ITGA6, IQGAP1, CCT8
GOTERM_BP_DIRECT	18	4.30622	0.0254794	370	459	16792	1.77976	1	0.970868	35.4506	GO:0007155~cell adhesion	CTNNA3, CDH13, TM9SF4, SYMPK, MYBPC1, CTNND1, LAMA3, LAMC1, CD44, FAP, CD99L2, BCAM, MYBPC2, POSTN, FREM2, ITGA6, LAMB1, TNC
GOTERM_CC_DIRECT	3	0.717703	0.0260392	390	12	18224	11.6821	0.999978	0.623267	30.8532	GO:0043220~Schmidt-Lanterman incisure	MPP5, SIRT2, JAM3
GOTERM_MF_DIRECT	3	0.717703	0.026395	364	12	16881	11.5941	1	0.8643	33.0481	GO:0042623~ATPase activity, coupled	PEX1, MYH3, CCT8
GOTERM_CC_DIRECT	8	1.91388	0.0268301	390	136	18224	2.74872	0.999984	0.602444	31.6342	GO:0005802~trans-Golgi network	OCRL, SLC9A7, CLASP2, POSTN, IGF2R, GCC2, DNM2, PLEKHA8
GOTERM_BP_FAT	12	2.87081	0.0270016	368	256	16650	2.12084	1	0.833591	40.3204	GO:0090316~positive regulation of intracellular protein transport	EGF, BMP6, CTDSPL2, SEC16B, ITGB1BP1, TM9SF4, MYBPC1, RBCK1, PRELID3A, TCF7L2, SREBF2, HCLS1
GOTERM_MF_FAT	9	2.15311	0.0272893	338	164	15478	2.51302	1	0.655532	35.5539	GO:0031406~carboxylic acid binding	OGFOD1, IGF2R, ACACB, RTF1, KARS, PLOD1, P3H1, SESN1, PPARG
GOTERM_BP_DIRECT	3	0.717703	0.0274798	370	12	16792	11.3459	1	0.971124	37.6614	GO:0097067~cellular response to thyroid hormone stimulus	CTSB, CTSS, KIT
GOTERM_BP_DIRECT	3	0.717703	0.0274798	370	12	16792	11.3459	1	0.971124	37.6614	GO:0031581~hemidesmosome assembly	LAMC1, ITGA6, LAMA3
GOTERM_BP_FAT	3	0.717703	0.0276357	368	12	16650	11.3111	1	0.836373	41.0497	GO:0031581~hemidesmosome assembly	LAMC1, ITGA6, LAMA3
GOTERM_BP_FAT	3	0.717703	0.0276357	368	12	16650	11.3111	1	0.836373	41.0497	GO:0060544~regulation of necroptotic process	CFLAR, RBCK1, YBX3
GOTERM_BP_FAT	3	0.717703	0.0276357	368	12	16650	11.3111	1	0.836373	41.0497	GO:0010889~regulation of sequestering of triglyceride	OSBPL8, ABHD5, PPARG
GOTERM_BP_FAT	3	0.717703	0.0276357	368	12	16650	11.3111	1	0.836373	41.0497	GO:0002192~IRES-dependent translational initiation	EIF2D, SSB, EIF3D
INTERPRO	4	0.956938	0.0278642	397	31	18559	6.03201	1	0.968052	35.4315	IPR001627:Semaphorin/CD100 antigen	PLXNA2, PLXNA4, SEMA6C, SEMA5B
GOTERM_BP_DIRECT	15	3.58852	0.0278973	370	359	16792	1.89626	1	0.965245	38.1138	GO:0016567~protein ubiquitination	KBTBD2, KLHL13, WSB1, WDTC1, WSB2, ZNRF3, KLHL41, RNF14, MID2, KLHL5, FBXO25, MDM4, ATG7, KLHL29, FBXO30
GOTERM_CC_DIRECT	5	1.19617	0.0279911	390	54	18224	4.32669	0.99999	0.588866	32.7659	GO:0005778~peroxisomal membrane	PEX1, ACSL1, PNPLA8, FAR2, HSD17B4
GOTERM_CC_FAT	19	4.54545	0.0282065	343	467	14527	1.72313	1	0.622579	34.5455	GO:0015629~actin cytoskeleton	KIF9, MYLK3, ARPC2, VASP, TNNT1, MYBPC1, TPM3, WDR1, FYN, TMOD1, MYH3, MYOZ2, SPTAN1, MYBPC2, MYH8, IQGAP1, PEAK1, MYL6, MYO10
KEGG_PATHWAY	15	3.58852	0.0285522	161	345	6910	1.86605	0.998565	0.66416	30.95	hsa04151:PI3K-Akt signaling pathway	EGF, PPP2R5E, IKBKB, CASP9, KRAS, LAMA3, LAMC1, PPP2R5A, COL27A1, ATF4, KIT, ITGA6, IL4R, LAMB1, TNC
GOTERM_CC_DIRECT	28	6.69856	0.0285728	390	857	18224	1.52671	0.999992	0.569476	33.3264	GO:0005730~nucleolus	SRP68, POLR1A, PAFAH1B2, TFIP11, TYMS, NBN, NUFIP1, PAPD5, STON2, POLA1, SETX, PDCD11, DDX47, NOVA1, TRA2A, WDR12, NSUN2, MYO10, CTSB, XPC, EXOSC7, GOLGA3, NIN, FBXO25, CEP85, RPF1, WDR3, RTF1
KEGG_PATHWAY	4	0.956938	0.028654	161	29	6910	5.9199	0.998599	0.608836	31.0424	hsa05216:Thyroid cancer	TPM3, KRAS, TCF7L2, PPARG
GOTERM_MF_FAT	53	12.6794	0.0289424	338	1841	15478	1.31832	1	0.664075	37.2712	GO:0035639~purine ribonucleoside triphosphate binding	ACSF3, ACSL1, EHD2, GRK4, RAB2B, MASTL, GRK7, DDX47, MYH8, WNK2, MCM8, UBE2K, KARS, PEAK1, MYO10, MYLK3, KIF9, BAZ1B, FYN, NIN, NEK7, MYH3, RBKS, KIF24, CCT8, RTCB, IKBKB, DHX30, ZRANB3, DSTYK, STARD9, ACACB, PNPLA8, RFC2, AARSD1, SETX, OPA1, TK2, RAB4A, KRAS, HELZ, PAK4, HK2, ABCA8, CDKL1, HK1, RTCA, PEX1, DNM2, KIT, SRPK3, ALPK3, ABCC10
GOTERM_BP_FAT	9	2.15311	0.0291165	368	164	16650	2.48293	1	0.847729	42.7197	GO:0050731~positive regulation of peptidyl-tyrosine phosphorylation	FYN, EGF, CD44, STAT3, IL31RA, KIT, ACE, IQGAP1, HCLS1
GOTERM_MF_DIRECT	10	2.39234	0.0292569	364	200	16881	2.31882	1	0.86404	35.9398	GO:0016491~oxidoreductase activity	F8, FADS3, SUMF1, MAOA, RETSAT, HSDL2, FAR2, HSD17B4, SLC9B2, PRDX4
GOTERM_BP_FAT	45	10.7656	0.0292806	368	1494	16650	1.36279	1	0.845403	42.902	GO:0016192~vesicle-mediated transport	EGF, F8, SYNJ1, CDH13, SCARB1, CLASP2, TM9SF4, LEPR, CYFIP2, IGF2R, LMF1, EHD2, GRK4, EXOC6, WDR1, STON2, RAB2B, USP6NL, CLINT1, TMED7, COPB1, COG1, LMAN2, SYT9, MYO10, PPARG, RAB4A, LMBRD1, ARPC2, PDIA6, GRTP1, SEC16B, NAPB, GPR107, CALCR, NECAP1, PLCG2, GCC2, FYN, GOLGA3, VLDLR, SPTAN1, KIT, DNM2, IL4R
GOTERM_BP_FAT	7	1.67464	0.0298611	368	106	16650	2.98785	1	0.847223	43.5425	GO:0032526~response to retinoic acid	BMP6, SYNJ1, SETX, IGF2R, GDAP2, TNC, PPARG
GOTERM_BP_FAT	30	7.17703	0.0298652	368	910	16650	1.49158	1	0.843388	43.547	GO:0006396~RNA processing	RTCB, TFIP11, SSB, DHX30, NUFIP1, ECD, HNRNPDL, SLBP, PAPD5, BUD13, SETX, PDCD11, RPP40, DDX47, THOC5, NOVA1, TRA2A, WDR12, KARS, NSUN2, SYMPK, SRRM1, EXOSC7, NCOR2, RTCA, INTS8, AAR2, RPF1, PPP1R8, WDR3
GOTERM_BP_FAT	37	8.85167	0.0305278	368	1183	16650	1.41509	1	0.846002	44.2697	GO:0051130~positive regulation of cellular component organization	EGF, SYNJ1, FBXO38, CLASP2, NBN, EHD2, SIRT2, WDR1, HCLS1, SETX, ITGB1BP1, PRELID3A, LMAN2, OPA1, SREBF2, CEP295, PALM, KIDINS220, PPARG, MYLK3, ARPC2, VASP, MYBPC1, PLCG2, HK2, FYN, NDEL1, NEK7, VLDLR, TCF7L2, KIT, RTF1, DNM2, IQGAP1, IL4R, ARHGEF15, CCT8
GOTERM_MF_FAT	66	15.7895	0.0311494	338	2389	15478	1.2651	1	0.67853	39.4971	GO:0000166~nucleotide binding	SSB, ACSF3, TYMS, ACSL1, EHD2, SIRT2, GRK4, RAB2B, POLA1, MASTL, GRK7, DDX47, WNK2, MYH8, BOLL, MCM8, KARS, UBE2K, PEAK1, MYO10, MYLK3, KIF9, BAZ1B, UHRF1, FYN, NIN, PRKAR1B, NEK7, MYH3, RBKS, KIF24, HCN1, CCT8, RTCB, SYNJ1, IKBKB, DHX30, ZRANB3, DSTYK, STARD9, ACACB, PNPLA8, RFC2, HNRNPDL, AARSD1, SETX, TRA2A, OPA1, NOX5, TK2, RAB4A, KRAS, HELZ, PAK4, HK2, D2HGDH, ABCA8, CDKL1, HK1, RTCA, PEX1, …
GOTERM_CC_FAT	24	5.74163	0.0311824	343	644	14527	1.57836	1	0.640148	37.4527	GO:0005911~cell-cell junction	SLC5A1, CTNNA3, CAST, VASP, SYMPK, UBN1, EIF2A, SIRT2, PAK4, JAM3, CTNND1, WDR1, MPP5, GOLGA3, CLINT1, ZC3HAV1, CLMP, PDLIM1, SPTAN1, KIT, YBX3, ITGA6, IQGAP1, CCT8
GOTERM_CC_DIRECT	20	4.78469	0.0311876	390	558	18224	1.67485	0.999997	0.576711	35.7925	GO:0043231~intracellular membrane-bounded organelle	TNPO3, RAB4A, SEC16B, SFXN4, SCARB1, CTSB, CTSS, HSD17B4, TDP1, CLINT1, PEX1, COPB1, NOVA1, SPTAN1, TRA2A, PLAGL1, PALM, ABHD5, PITPNM2, PPARG
GOTERM_CC_FAT	3	0.717703	0.0312103	343	12	14527	10.5882	1	0.621615	37.4794	GO:0043220~Schmidt-Lanterman incisure	MPP5, SIRT2, JAM3
GOTERM_BP_FAT	15	3.58852	0.0312324	368	363	16650	1.86961	1	0.848901	45.0285	GO:1903829~positive regulation of cellular protein localization	EGF, CTDSPL2, SEC16B, TM9SF4, MYBPC1, HCLS1, FYN, BMP6, ITGB1BP1, RBCK1, PRELID3A, TCF7L2, SREBF2, IQGAP1, CCT8
GOTERM_MF_FAT	66	15.7895	0.0313909	338	2390	15478	1.26457	1	0.669009	39.7361	GO:1901265~nucleoside phosphate binding	SSB, ACSF3, TYMS, ACSL1, EHD2, SIRT2, GRK4, RAB2B, POLA1, MASTL, GRK7, DDX47, WNK2, MYH8, BOLL, MCM8, KARS, UBE2K, PEAK1, MYO10, MYLK3, KIF9, BAZ1B, UHRF1, FYN, NIN, PRKAR1B, NEK7, MYH3, RBKS, KIF24, HCN1, CCT8, RTCB, SYNJ1, IKBKB, DHX30, ZRANB3, DSTYK, STARD9, ACACB, PNPLA8, RFC2, HNRNPDL, AARSD1, SETX, TRA2A, OPA1, NOX5, TK2, RAB4A, KRAS, HELZ, PAK4, HK2, D2HGDH, ABCA8, CDKL1, HK1, RTCA, PEX1, …
GOTERM_MF_FAT	17	4.06699	0.0314775	338	439	15478	1.7733	1	0.658018	39.8216	GO:0019787~ubiquitin-like protein transferase activity	KBTBD2, KLHL13, CDC23, WSB1, RNF141, ZNRF3, UHRF1, KLHL41, RNF14, RNF144B, KLHL5, FBXO25, MDM4, RBCK1, KLHL29, UBE2K, FBXO30
KEGG_PATHWAY	5	1.19617	0.0317123	161	52	6910	4.12685	0.999313	0.597631	33.7672	hsa05213:Endometrial cancer	EGF, CTNNA3, KRAS, CASP9, TCF7L2
GOTERM_MF_FAT	53	12.6794	0.0317227	338	1850	15478	1.3119	1	0.649254	40.0631	GO:0032550~purine ribonucleoside binding	ACSF3, ACSL1, EHD2, GRK4, RAB2B, MASTL, GRK7, DDX47, MYH8, WNK2, MCM8, UBE2K, KARS, PEAK1, MYO10, MYLK3, KIF9, BAZ1B, FYN, NIN, NEK7, MYH3, RBKS, KIF24, CCT8, RTCB, IKBKB, DHX30, ZRANB3, DSTYK, STARD9, ACACB, PNPLA8, RFC2, AARSD1, SETX, OPA1, TK2, RAB4A, KRAS, HELZ, PAK4, HK2, ABCA8, CDKL1, HK1, RTCA, PEX1, DNM2, KIT, SRPK3, ALPK3, ABCC10
GOTERM_CC_FAT	8	1.91388	0.0317311	343	128	14527	2.64705	1	0.609864	37.9753	GO:0044420~extracellular matrix component	LAMC1, MATN2, COL27A1, FREM2, ITGA6, LAMA3, TNC, LAMB1
GOTERM_BP_FAT	6	1.43541	0.0317403	368	80	16650	3.39334	1	0.849896	45.5695	GO:0035305~negative regulation of dephosphorylation	IKBKB, MASTL, ARFGEF3, UBN1, PPP1R8, IQGAP1
GOTERM_MF_FAT	6	1.43541	0.0317449	338	81	15478	3.39207	1	0.638202	40.0849	GO:0019842~vitamin binding	LMBRD1, OGFOD1, TYMS, ACACB, PLOD1, P3H1
GOTERM_MF_FAT	53	12.6794	0.0318232	338	1853	15478	1.30978	1	0.628141	40.1618	GO:0032549~ribonucleoside binding	ACSF3, ACSL1, EHD2, GRK4, RAB2B, MASTL, GRK7, DDX47, MYH8, WNK2, MCM8, UBE2K, KARS, PEAK1, MYO10, MYLK3, KIF9, BAZ1B, FYN, NIN, NEK7, MYH3, RBKS, KIF24, CCT8, RTCB, IKBKB, DHX30, ZRANB3, DSTYK, STARD9, ACACB, PNPLA8, RFC2, AARSD1, SETX, OPA1, TK2, RAB4A, KRAS, HELZ, PAK4, HK2, ABCA8, CDKL1, HK1, RTCA, PEX1, DNM2, KIT, SRPK3, ALPK3, ABCC10
GOTERM_MF_FAT	53	12.6794	0.0318232	338	1853	15478	1.30978	1	0.628141	40.1618	GO:0001883~purine nucleoside binding	ACSF3, ACSL1, EHD2, GRK4, RAB2B, MASTL, GRK7, DDX47, MYH8, WNK2, MCM8, UBE2K, KARS, PEAK1, MYO10, MYLK3, KIF9, BAZ1B, FYN, NIN, NEK7, MYH3, RBKS, KIF24, CCT8, RTCB, IKBKB, DHX30, ZRANB3, DSTYK, STARD9, ACACB, PNPLA8, RFC2, AARSD1, SETX, OPA1, TK2, RAB4A, KRAS, HELZ, PAK4, HK2, ABCA8, CDKL1, HK1, RTCA, PEX1, DNM2, KIT, SRPK3, ALPK3, ABCC10
GOTERM_BP_DIRECT	3	0.717703	0.0320115	370	13	16792	10.4732	1	0.973259	42.4091	GO:0030239~myofibril assembly	TMOD1, MYOZ2, KLHL41
GOTERM_CC_FAT	10	2.39234	0.0320183	343	186	14527	2.27703	1	0.596162	38.2473	GO:0031968~organelle outer membrane	HK1, ACSL1, GPAM, MAOA, ACACB, OPA1, RETSAT, AKAP1, TOMM34, HK2
GOTERM_BP_FAT	3	0.717703	0.0321918	368	13	16650	10.4411	1	0.850356	46.0461	GO:0055098~response to low-density lipoprotein particle	CDH13, SREBF2, PPARG
GOTERM_BP_FAT	3	0.717703	0.0321918	368	13	16650	10.4411	1	0.850356	46.0461	GO:0010885~regulation of cholesterol storage	SCARB1, SREBF2, PPARG
GOTERM_BP_FAT	23	5.50239	0.0324585	368	653	16650	1.59361	1	0.849162	46.3258	GO:0070925~organelle assembly	KIF9, MYLK3, OCRL, DHX30, CEP164, STARD9, EIF2A, ATG4D, KLHL41, WDR1, C5orf42, ADAMTS16, USP6NL, CFLAR, TMOD1, OGFOD1, NEK7, MYH3, MYOZ2, TUBGCP5, KIF24, RPF1, CEP295
GOTERM_BP_FAT	4	0.956938	0.0328658	368	32	16650	5.65557	1	0.849236	46.7503	GO:0045214~sarcomere organization	MYLK3, MYH3, KLHL41, WDR1
GOTERM_BP_FAT	18	4.30622	0.0331178	368	472	16650	1.72543	1	0.847949	47.0113	GO:0010608~posttranscriptional regulation of gene expression	CDC123, TYMS, CALCR, PSMB2, EIF2A, EXOSC7, ACE, NCOR2, AARSD1, PAIP1, OGFOD1, NRDE2, EIF3K, STAT3, ATF4, BOLL, EIF3D, YBX3
GOTERM_BP_FAT	45	10.7656	0.0338739	368	1508	16650	1.35014	1	0.851039	47.7872	GO:0051247~positive regulation of protein metabolic process	EGF, CDC123, DSTYK, NBN, ACSL1, CYFIP2, SIRT2, ACE, HCLS1, RNF14, BMP6, PAIP1, CD44, MASTL, ITGB1BP1, STAT3, ATG7, BOLL, UBE2K, YBX3, ANTXR1, KIDINS220, PPARG, TNFRSF19, CDC23, SYMPK, CASP9, KRAS, IL31RA, PSMB2, UHRF1, DIABLO, CCNK, MMD, NCOR2, CREBRF, FYN, RNF144B, PRKAR1B, PPP2R5A, VLDLR, OSBPL8, KIT, RTF1, IQGAP1
GOTERM_CC_DIRECT	7	1.67464	0.034229	390	113	18224	2.89467	0.999999	0.587678	38.5544	GO:0005923~bicellular tight junction	MPP5, CLMP, VASP, SYMPK, UBN1, YBX3, JAM3
GOTERM_BP_FAT	27	6.45933	0.0345437	368	807	16650	1.51376	1	0.853285	48.4656	GO:0044087~regulation of cellular component biogenesis	MYLK3, KIF9, ARPC2, IKBKB, NAPB, CLASP2, VASP, TFIP11, ANKRA2, SIRT2, ACE, KLHL41, HCLS1, ADAMTS16, USP6NL, SETX, TMOD1, ITGB1BP1, SPTAN1, DNM2, KIT, PALM, ANTXR1, CEP295, IQGAP1, ARHGEF15, MYO10
GOTERM_BP_FAT	6	1.43541	0.0347854	368	82	16650	3.31058	1	0.851948	48.7084	GO:0010508~positive regulation of autophagy	PAFAH1B2, MID2, ATG7, SPTLC2, TPCN1, HK2
GOTERM_BP_FAT	47	11.244	0.035254	368	1594	16650	1.33406	1	0.852493	49.176	GO:0046907~intracellular transport	EGF, SRP68, F8, TNPO3, CTDSPL2, TM9SF4, STARD9, ACACB, LMF1, UBAC2, ATG4D, SLBP, HCLS1, USP6NL, BUD13, BMP6, TMED7, ITGB1BP1, THOC5, STAT3, COPB1, COG1, RBCK1, PRELID3A, LMAN2, OPA1, SREBF2, PALM, MYO10, GRTP1, SEC16B, NAPB, MYBPC1, GCC2, SRRM1, PLEKHA8, CREBRF, EIF2D, PEX1, NDEL1, ZDHHC3, SPTAN1, KIT, TCF7L2, TOMM34, NUP85, IL4R
GOTERM_BP_DIRECT	4	0.956938	0.0353069	370	33	16792	5.50106	1	0.976851	45.6456	GO:0071526~semaphorin-plexin signaling pathway	PLXNA2, PLXNA4, SEMA6C, SEMA5B
GOTERM_CC_FAT	8	1.91388	0.0353339	343	131	14527	2.58643	1	0.616634	41.3074	GO:0043296~apical junction complex	MPP5, CLMP, VASP, SYMPK, UBN1, YBX3, JAM3, CTNND1
GOTERM_BP_FAT	8	1.91388	0.0367816	368	141	16650	2.56707	1	0.861296	50.6722	GO:1990138~neuron projection extension	PLXNA2, PLXNA4, NDEL1, IFRD1, POSTN, SEMA6C, IQGAP1, SEMA5B
GOTERM_BP_FAT	33	7.89474	0.0367853	368	1043	16650	1.43152	1	0.858176	50.6759	GO:0044255~cellular lipid metabolic process	EGF, SYNJ1, ACSF3, SCARB1, ACSL1, ACACB, LMF1, PNPLA8, ARSD, SIRT2, SPTLC2, HSD17B4, INPP4A, CERS6, SUMF1, ABHD5, ELOVL7, PPARG, OCRL, FADS3, WDTC1, PLCG2, GPAM, NAPEPLD, BCO1, NCOR2, FYN, LPCAT2, CEPT1, AMACR, SGMS1, KIT, RETSAT
GOTERM_BP_FAT	3	0.717703	0.0370192	368	14	16650	9.69526	1	0.856832	50.9013	GO:0097067~cellular response to thyroid hormone stimulus	CTSB, CTSS, KIT
GOTERM_BP_FAT	21	5.02392	0.0375546	368	589	16650	1.61313	1	0.857794	51.4135	GO:0061061~muscle structure development	MYLK3, KRAS, EHD2, TEAD4, RORA, SIRT2, UNC45B, KLHL41, WDR1, CFLAR, TMOD1, IFRD1, MYH3, MYOZ2, KIT, TCF7L2, SRPK3, PLAGL1, YBX3, IL4R, MYL6
GOTERM_BP_FAT	15	3.58852	0.0375726	368	373	16650	1.81949	1	0.854849	51.4305	GO:0033157~regulation of intracellular protein transport	EGF, CTDSPL2, SEC16B, TM9SF4, MYBPC1, GCC2, UBAC2, HCLS1, BMP6, NDEL1, ITGB1BP1, RBCK1, PRELID3A, TCF7L2, SREBF2
GOTERM_BP_FAT	56	13.3971	0.0376602	368	1968	16650	1.28745	1	0.852443	51.5138	GO:0048468~cell development	FBXO38, CLASP2, TYMS, SIRT2, KLHL41, HSD17B4, MPP5, BMP6, MATN2, STAT3, CTHRC1, NSUN2, ANTXR1, PALM, PEAK1, KIDINS220, PPARG, LAMB1, MYLK3, ARPC2, VASP, JAM3, SLC9B2, MMD, FYN, CFLAR, TMOD1, RAP1GAP2, MYH3, IFRD1, HCN1, SYNJ1, IKBKB, SEMA6C, WDR1, PLXNA2, SETX, ITGB1BP1, COL27A1, MYOZ2, OPA1, SEMA5B, TNC, PLXNA4, CASP9, KRAS, PAK4, LAMC1, NDEL1, VLDLR, SPTAN1, POSTN, DNM2, TCF7L2, KIT, IQGAP1
GOTERM_BP_FAT	18	4.30622	0.0378164	368	480	16650	1.69667	1	0.850577	51.6621	GO:0022613~ribonucleoprotein complex biogenesis	DHX30, CDC123, EIF2A, NUFIP1, EXOSC7, PAPD5, EIF2D, PDCD11, SETX, RPP40, OGFOD1, DDX47, EIF3K, AAR2, WDR12, RPF1, WDR3, EIF3D
GOTERM_BP_FAT	82	19.6172	0.0378193	368	3052	16650	1.21561	1	0.847547	51.6648	GO:0009893~positive regulation of metabolic process	EGF, MED14, ACSL1, CYFIP2, NUFIP1, RORA, ECD, SIRT2, ACE, KDM6A, RNF14, BMP6, PAIP1, MASTL, STAT3, ZNF382, BOLL, SREBF2, PLAGL1, UBE2K, ANTXR1, YBX3, KIDINS220, PPARG, TNFRSF19, CDC23, SEC16B, CALCR, BAZ1B, SYMPK, PLCG2, PSMB2, IL31RA, UHRF1, CCNK, MMD, NCOR2, FYN, ZC3HAV1, PRKAR1B, NEK7, OSBPL8, SGMS1, NUP85, ITGA6, CCT8, NPAS3, POLR1A, IKBKB, CDH13, SCARB1, CDC123, NBN, DSTYK, ACACB, SPTLC2, RF…
GOTERM_CC_FAT	10	2.39234	0.038005	343	192	14527	2.20587	1	0.628289	43.6691	GO:0019867~outer membrane	HK1, ACSL1, GPAM, MAOA, ACACB, OPA1, RETSAT, AKAP1, TOMM34, HK2
KEGG_PATHWAY	16	3.82775	0.038138	161	393	6910	1.74735	0.999847	0.623346	39.1718	hsa05200:Pathways in cancer	EGF, CTNNA3, IKBKB, TPM3, KRAS, CASP9, PLCG2, LAMA3, LAMC1, STAT3, TCF7L2, KIT, ARHGEF12, ITGA6, PPARG, LAMB1
GOTERM_MF_DIRECT	12	2.87081	0.0385472	364	278	16881	2.00186	1	0.909416	44.5438	GO:0003779~actin binding	KLHL5, TMOD1, VASP, AFAP1, FBXO25, MYOZ2, MYBPC1, SPTAN1, SNTB1, MYBPC2, ACE, HCLS1
GOTERM_BP_FAT	23	5.50239	0.0385651	368	665	16650	1.56485	1	0.850211	52.3665	GO:0006897~endocytosis	SYNJ1, LMBRD1, ARPC2, PDIA6, SCARB1, TM9SF4, GPR107, NECAP1, CALCR, LEPR, PLCG2, IGF2R, CYFIP2, EHD2, GRK4, STON2, FYN, CLINT1, VLDLR, DNM2, LMAN2, MYO10, PPARG
GOTERM_BP_FAT	30	7.17703	0.0388532	368	932	16650	1.45637	1	0.849391	52.6349	GO:0040007~growth	EI24, CLASP2, TYMS, NBN, LEPR, SEMA6C, ACACB, KDM6A, PLXNA2, BMP6, COL27A1, STAT3, CPQ, YBX3, SEMA5B, PPARG, TNC, PALB2, PLXNA4, WDTC1, GPAM, PAK4, CFLAR, NDEL1, IFRD1, SGMS1, POSTN, RTF1, DNM2, IQGAP1
INTERPRO	14	3.34928	0.0391093	397	351	18559	1.8646	1	0.985789	46.0733	IPR016024:Armadillo-type fold	PPP2R5E, TNPO3, CLASP2, SYMPK, ARFGEF3, UNC45B, CTNND1, ZNFX1, PAIP1, PPP2R5A, IFRD1, EIF3K, COPB1, RALGAPA2
GOTERM_CC_FAT	9	2.15311	0.0391634	343	163	14527	2.3385	1	0.624537	44.6656	GO:0005741~mitochondrial outer membrane	HK1, ACSL1, GPAM, MAOA, ACACB, OPA1, AKAP1, TOMM34, HK2
GOTERM_BP_FAT	6	1.43541	0.0396813	368	85	16650	3.19373	1	0.852556	53.3986	GO:0043244~regulation of protein complex disassembly	TMOD1, SETX, OGFOD1, CLASP2, SPTAN1, WDR1
INTERPRO	3	0.717703	0.0396984	397	15	18559	9.34962	1	0.97849	46.5828	IPR002867:Zinc finger, C6HC-type	RNF144B, RBCK1, RNF14
GOTERM_MF_DIRECT	5	1.19617	0.0399983	364	60	16881	3.8647	1	0.898321	45.7859	GO:0005518~collagen binding	CD44, CTSB, CTSS, ANTXR1, P3H1
KEGG_PATHWAY	5	1.19617	0.0401042	161	56	6910	3.83208	0.999904	0.603481	40.7425	hsa05221:Acute myeloid leukemia	IKBKB, STAT3, KRAS, KIT, TCF7L2
GOTERM_MF_DIRECT	3	0.717703	0.0402558	364	15	16881	9.27527	1	0.880443	46.0036	GO:0030169~low-density lipoprotein particle binding	CDH13, SCARB1, ANKRA2
KEGG_PATHWAY	8	1.91388	0.0406866	161	138	6910	2.48807	0.999916	0.574038	41.2004	hsa04910:Insulin signaling pathway	HK1, PDE3B, IKBKB, PHKA2, PRKAR1B, KRAS, ACACB, HK2
GOTERM_CC_FAT	14	3.34928	0.0410113	343	322	14527	1.84142	1	0.627421	46.2212	GO:0031984~organelle subcompartment	GOLGA3, LPCAT2, OCRL, SLC9A7, CLASP2, COG1, OSBPL8, SGMS1, IGF2R, POSTN, GCC2, DNM2, PLEKHA8, USP6NL
GOTERM_BP_DIRECT	4	0.956938	0.0410272	370	35	16792	5.18672	1	0.984157	50.8607	GO:0000731~DNA synthesis involved in DNA repair	PALB2, POLA1, TOP3A, NBN
GOTERM_MF_FAT	3	0.717703	0.0411702	338	15	15478	9.15858	1	0.713277	48.7045	GO:0030169~low-density lipoprotein particle binding	CDH13, SCARB1, ANKRA2
GOTERM_BP_FAT	17	4.06699	0.0411928	368	449	16650	1.71305	1	0.860331	54.7624	GO:0060627~regulation of vesicle-mediated transport	RAB4A, SYNJ1, GRTP1, NAPB, CLASP2, SCARB1, CDH13, PLCG2, EHD2, STON2, RAB2B, USP6NL, DNM2, LMAN2, SYT9, IL4R, PPARG
GOTERM_CC_FAT	15	3.58852	0.0415221	343	354	14527	1.79461	1	0.618192	46.644	GO:0098589~membrane region	OCRL, SYNJ1, IKBKB, SCARB1, CDH13, NECAP1, KRAS, EHD2, FYN, HK1, CFLAR, VLDLR, KCNQ1, DNM2, IQGAP1
GOTERM_BP_FAT	15	3.58852	0.0416636	368	379	16650	1.79068	1	0.860732	55.1795	GO:0046486~glycerolipid metabolic process	EGF, OCRL, SYNJ1, SCARB1, ACSL1, PLCG2, GPAM, LMF1, PNPLA8, INPP4A, FYN, LPCAT2, CEPT1, KIT, ABHD5
GOTERM_MF_DIRECT	4	0.956938	0.0417452	364	36	16881	5.15293	1	0.870852	47.2468	GO:0004896~cytokine receptor activity	CD44, IL31RA, IL13RA1, IL4R
GOTERM_BP_FAT	8	1.91388	0.0417695	368	145	16650	2.49625	1	0.858676	55.2728	GO:0035303~regulation of dephosphorylation	IKBKB, MASTL, PPP2R5A, ARFGEF3, SYMPK, UBN1, PPP1R8, IQGAP1
GOTERM_BP_DIRECT	3	0.717703	0.0418718	370	15	16792	9.07676	1	0.981857	51.5896	GO:0097009~energy homeostasis	STAT3, LEPR, ACACB
GOTERM_BP_FAT	3	0.717703	0.042104	368	15	16650	9.04891	1	0.858178	55.5663	GO:0030730~sequestering of triglyceride	OSBPL8, ABHD5, PPARG
GOTERM_BP_FAT	3	0.717703	0.042104	368	15	16650	9.04891	1	0.858178	55.5663	GO:0010878~cholesterol storage	SCARB1, SREBF2, PPARG
GOTERM_BP_FAT	3	0.717703	0.042104	368	15	16650	9.04891	1	0.858178	55.5663	GO:0002190~cap-independent translational initiation	EIF2D, SSB, EIF3D
GOTERM_MF_DIRECT	5	1.19617	0.0421075	364	61	16881	3.80134	1	0.854457	47.5452	GO:0004197~cysteine-type endopeptidase activity	CFLAR, CTSB, CTSS, CASP9, ATG4D
GOTERM_BP_FAT	65	15.5502	0.0424257	368	2357	16650	1.24773	1	0.857603	55.8469	GO:0050790~regulation of catalytic activity	EGF, TFIP11, ACSL1, LEPR, CYFIP2, LMF1, ACE, MASTL, STAT3, ANTXR1, ARHGEF12, PALM, KIDINS220, RALGAPA2, PPARG, RGSL1, CDC23, WDTC1, CALCR, PSMB2, UHRF1, CCNK, MMD, FYN, CFLAR, RAP1GAP2, PRKAR1B, NEK7, CEP85, OSBPL8, ITGA6, PPP2R5E, IKBKB, SCARB1, DSTYK, NBN, ARFGEF3, ACACB, RFC2, USP6NL, ARHGAP31, CD44, ITGB1BP1, ABHD5, RAB4A, OCRL, CAST, GRTP1, CTSB, CASP9, KRAS, UBN1, DIABLO, DENND5B, ANXA5, PP…
GOTERM_BP_FAT	6	1.43541	0.0431667	368	87	16650	3.12031	1	0.859799	56.4867	GO:0007044~cell-substrate junction assembly	LAMC1, CLASP2, ITGB1BP1, ITGA6, LAMA3, IQGAP1
GOTERM_BP_FAT	2	0.478469	0.0435995	368	2	16650	45.2446	1	0.859948	56.8564	GO:1905050~positive regulation of metallopeptidase activity	STAT3, ANTXR1
GOTERM_MF_DIRECT	7	1.67464	0.0436004	364	119	16881	2.72802	1	0.846236	48.758	GO:0017124~SH3 domain binding	ARHGAP31, OSTF1, VASP, SH3BGR, CASP9, DNM2, HCLS1
GOTERM_BP_FAT	12	2.87081	0.0438396	368	277	16650	1.96005	1	0.858858	57.0602	GO:0006909~phagocytosis	FYN, ARPC2, PDIA6, SCARB1, TM9SF4, LEPR, PLCG2, CYFIP2, DNM2, LMAN2, MYO10, PPARG
INTERPRO	4	0.956938	0.0438952	397	37	18559	5.05385	1	0.978267	50.0843	IPR000253:Forkhead-associated (FHA) domain	SLMAP, NBN, STARD9, PPP1R8
GOTERM_BP_FAT	4	0.956938	0.0443846	368	36	16650	5.02717	1	0.859729	57.5194	GO:0048841~regulation of axon extension involved in axon guidance	PLXNA2, PLXNA4, SEMA6C, SEMA5B
INTERPRO	3	0.717703	0.0447424	397	16	18559	8.76527	1	0.971263	50.7645	IPR008211:Laminin, N-terminal	LAMC1, LAMA3, LAMB1
INTERPRO	3	0.717703	0.0447424	397	16	18559	8.76527	1	0.971263	50.7645	IPR006620:Prolyl 4-hydroxylase, alpha subunit	OGFOD1, PLOD1, P3H1
GOTERM_CC_FAT	5	1.19617	0.0449727	343	57	14527	3.71516	1	0.634836	49.4196	GO:0005778~peroxisomal membrane	PEX1, ACSL1, PNPLA8, FAR2, HSD17B4
GOTERM_CC_FAT	5	1.19617	0.0449727	343	57	14527	3.71516	1	0.634836	49.4196	GO:0031903~microbody membrane	PEX1, ACSL1, PNPLA8, FAR2, HSD17B4
GOTERM_CC_FAT	46	11.0048	0.045108	343	1482	14527	1.31459	1	0.623058	49.5256	GO:0005794~Golgi apparatus	EI24, F8, IFNGR2, CLASP2, TM9SF4, STARD9, XYLT2, IGF2R, LMF1, PNPLA8, RAB2B, USP6NL, CLINT1, TMED7, SLC39A11, PDE3B, CD44, SLC9A7, COPB1, COG1, LMAN2, PLAGL1, SREBF2, CPQ, PPARG, OCRL, ARPC2, SEC16B, GPR107, GCC2, PAK4, PLEKHA8, JAM3, PTGFRN, MMD, GOLGA3, LPCAT2, ZC3HAV1, USF3, GLT8D2, CEP85, ZDHHC3, SGMS1, POSTN, DNM2, GALNT16
GOTERM_BP_FAT	5	1.19617	0.0454046	368	61	16650	3.70857	1	0.863522	58.3663	GO:0042531~positive regulation of tyrosine phosphorylation of STAT protein	FYN, STAT3, IL31RA, KIT, HCLS1
GOTERM_BP_FAT	25	5.98086	0.0454371	368	753	16650	1.50214	1	0.861183	58.393	GO:0000904~cell morphogenesis involved in differentiation	CLASP2, SEMA6C, WDR1, PLXNA2, MATN2, ITGB1BP1, ANTXR1, PEAK1, KIDINS220, SEMA5B, LAMB1, PLXNA4, ARPC2, VASP, KRAS, CASP9, LAMC1, FYN, NDEL1, IFRD1, VLDLR, SPTAN1, POSTN, TCF7L2, DNM2
GOTERM_CC_DIRECT	13	3.11005	0.045523	390	323	18224	1.8807	1	0.672236	47.8739	GO:0005913~cell-cell adherens junction	CAST, VASP, EIF2A, PAK4, CTNND1, GOLGA3, CLINT1, ZC3HAV1, PDLIM1, SPTAN1, ITGA6, IQGAP1, CCT8
GOTERM_BP_FAT	16	3.82775	0.045713	368	419	16650	1.72772	1	0.860354	58.6192	GO:0030031~cell projection assembly	ARPC2, OCRL, CDH13, CEP164, KLHL41, C5orf42, USP6NL, ADAMTS16, KIF24, DNM2, KIT, CEP295, PALM, ITGA6, NUP85, MYO10
GOTERM_MF_FAT	7	1.67464	0.0457797	338	119	15478	2.6937	1	0.741731	52.4832	GO:0017124~SH3 domain binding	ARHGAP31, OSTF1, VASP, SH3BGR, CASP9, DNM2, HCLS1
GOTERM_CC_DIRECT	73	17.4641	0.0458825	390	2784	18224	1.22527	1	0.654239	48.1478	GO:0005654~nucleoplasm	MED14, FKBP5, CTDSPL2, TYMS, ECD, RORA, GTF3C2, SLBP, KDM6A, TIMMDC1, MPP5, POLA1, CLINT1, MASTL, RPP40, STAT3, DDX47, ZBTB20, WDR12, PLAGL1, MCM8, PRIM2, SREBF2, NSUN2, PALM, PEAK1, PPARG, CDC23, BAZ1B, SYMPK, PSMB2, SRRM1, TEAD4, XPC, EXOSC7, CCNK, NCOR2, SEL1L3, TOP3A, LYRM1, INTS8, NEK7, MDM4, WDR3, TOMM34, CCT8, POLR1A, NPAS3, RTCB, NBN, STARD9, CEP164, SOX13, RFC2, HNRNPDL, PDCD11, SETX, TH…
GOTERM_MF_FAT	12	2.87081	0.0462988	338	283	15478	1.94175	1	0.736173	52.892	GO:0043168~anion binding	ALAS1, OGFOD1, IGF2R, ACACB, RTF1, SPTLC2, KARS, ACE, PLOD1, P3H1, SESN1, PPARG
GOTERM_MF_FAT	6	1.43541	0.0466271	338	90	15478	3.05286	1	0.72932	53.1488	GO:0004896~cytokine receptor activity	CD44, IFNGR2, LEPR, IL31RA, IL13RA1, IL4R
KEGG_PATHWAY	6	1.43541	0.0466668	161	85	6910	3.02959	0.99998	0.593455	45.7183	hsa05222:Small cell lung cancer	LAMC1, IKBKB, CASP9, ITGA6, LAMA3, LAMB1
GOTERM_CC_FAT	15	3.58852	0.0468469	343	361	14527	1.75981	1	0.624834	50.8701	GO:0005578~proteinaceous extracellular matrix	ADAMTSL3, TFIP11, LAMA3, P3H1, ADAMTS16, LAMC1, MATN2, COL27A1, CTHRC1, POSTN, FREM2, ITGA6, OLFML2A, LAMB1, TNC
GOTERM_CC_FAT	10	2.39234	0.047082	343	200	14527	2.11764	1	0.614664	51.0493	GO:0005802~trans-Golgi network	OCRL, SLC9A7, CLASP2, COG1, POSTN, IGF2R, GCC2, DNM2, PLEKHA8, USP6NL
GOTERM_BP_DIRECT	3	0.717703	0.0471728	370	16	16792	8.50946	1	0.986473	55.9371	GO:1900006~positive regulation of dendrite development	VLDLR, OPA1, IQGAP1
GOTERM_BP_DIRECT	3	0.717703	0.0471728	370	16	16792	8.50946	1	0.986473	55.9371	GO:0051642~centrosome localization	PLXNA2, NIN, NDEL1
GOTERM_CC_FAT	14	3.34928	0.0471842	343	328	14527	1.80774	1	0.603822	51.1271	GO:0043235~receptor complex	EGF, PLXNA4, IKBKB, LEPR, DIABLO, MCOLN1, IL13RA1, CHRNG, PLXNA2, CD44, VLDLR, PTPRB, ITGA6, IL4R
GOTERM_BP_FAT	15	3.58852	0.0473803	368	385	16650	1.76278	1	0.867828	59.9615	GO:0051186~cofactor metabolic process	ACSF3, TYMS, ACSL1, ACACB, GPAM, ECD, HK2, HSD17B4, AMD1, ALAS1, HK1, STAT3, FAR2, DLST, ELOVL7
GOTERM_CC_FAT	37	8.85167	0.0474159	343	1149	14527	1.36384	1	0.594386	51.3028	GO:0031967~organelle envelope	EI24, TNPO3, RTCB, SFXN4, TYMS, GMCL1, ACSL1, IGF2R, ACACB, TIMMDC1, POLA1, CERS6, STAT3, PRELID3A, OPA1, MAOA, GPAM, DIABLO, MRPL2, SLC9B2, HK2, ABCA8, RNF144B, CEPT1, HK1, RAP1GAP2, NDEL1, MCU, OSBPL8, NDUFA10, WDR3, DNM2, RETSAT, TOMM34, AKAP1, NUP85, COX4I1
GOTERM_BP_FAT	4	0.956938	0.0475384	368	37	16650	4.8913	1	0.866317	60.0867	GO:0071526~semaphorin-plexin signaling pathway	PLXNA2, PLXNA4, SEMA6C, SEMA5B
INTERPRO	5	1.19617	0.047706	397	64	18559	3.6522	1	0.969028	53.0767	IPR006652:Kelch repeat type 1	KLHL5, KLHL13, KBTBD2, KLHL29, KLHL41
GOTERM_BP_FAT	20	4.78469	0.048017	368	568	16650	1.59312	1	0.866666	60.4632	GO:0022604~regulation of cell morphogenesis	PLXNA4, ARPC2, CLASP2, SEMA6C, STRIP2, WDR1, USP6NL, ADAMTS16, PLXNA2, FYN, NDEL1, ITGB1BP1, IFRD1, POSTN, DNM2, KIT, TCF7L2, PALM, SEMA5B, MYO10
GOTERM_MF_FAT	29	6.9378	0.0480745	338	924	15478	1.43722	1	0.73121	54.2656	GO:0016301~kinase activity	EGF, IKBKB, DSTYK, IGF2R, GRK4, MASTL, GRK7, PHKA2, WNK2, TK2, PEAK1, KIDINS220, MYLK3, BAZ1B, PAK4, CCNK, HK2, MMD, CDKL1, FYN, HK1, PRKAR1B, NEK7, RBKS, SGMS1, KIT, SRPK3, ALPK3, AKAP1
GOTERM_BP_FAT	51	12.201	0.0484766	368	1796	16650	1.28478	1	0.866901	60.8216	GO:0051049~regulation of transport	EGF, CTDSPL2, CLASP2, TM9SF4, EHD2, RAB2B, BMP6, SLMAP, LMAN2, WNK2, SREBF2, PPARG, NAPB, SEC16B, MYBPC1, PLCG2, GPAM, MCU, KCNQ1, OSBPL8, HCN1, NUP85, IL4R, SYNJ1, SCARB1, CDH13, UBAC2, TPCN1, WDR1, HCLS1, STON2, P3H1, USP6NL, ITGB1BP1, RBCK1, PRELID3A, ATF4, SYT9, NOX5, RAB4A, LMBRD1, GRTP1, KCNH7, CTSS, GCC2, HK2, CREBRF, NDEL1, POSTN, TCF7L2, DNM2
GOTERM_BP_FAT	12	2.87081	0.0487373	368	282	16650	1.9253	1	0.866011	61.0235	GO:0006066~alcohol metabolic process	NUDT3, SYNJ1, OCRL, SCARB1, VLDLR, LEPR, PLCG2, RETSAT, SREBF2, SPTLC2, BCO1, INPP4A
GOTERM_BP_FAT	9	2.15311	0.0489248	368	182	16650	2.23737	1	0.864716	61.1681	GO:0044242~cellular lipid catabolic process	AMACR, PLCG2, ACACB, NAPEPLD, PNPLA8, SIRT2, SPTLC2, ABHD5, HSD17B4
GOTERM_CC_DIRECT	13	3.11005	0.0492039	390	327	18224	1.8577	1	0.660681	50.6156	GO:0005759~mitochondrial matrix	ALAS1, HAGH, ACSF3, LACTB2, TYMS, NDUFA10, MTRF1L, ATG4D, KARS, DLST, ACO2, TK2, D2HGDH
GOTERM_BP_FAT	76	18.1818	0.0495241	368	2839	16650	1.2112	1	0.86575	61.6269	GO:0031325~positive regulation of cellular metabolic process	EGF, MED14, ACSL1, CYFIP2, NUFIP1, RORA, ECD, SIRT2, ACE, RNF14, BMP6, PAIP1, MASTL, STAT3, ZNF382, BOLL, SREBF2, PLAGL1, UBE2K, YBX3, ANTXR1, KIDINS220, PPARG, TNFRSF19, CDC23, CALCR, BAZ1B, SYMPK, PLCG2, PSMB2, IL31RA, UHRF1, CCNK, MMD, NCOR2, FYN, ZC3HAV1, PRKAR1B, NEK7, OSBPL8, NUP85, ITGA6, CCT8, NPAS3, IKBKB, CDH13, SCARB1, CDC123, DSTYK, NBN, ACACB, SPTLC2, RFC2, HCLS1, SETX, CD44, THOC5, …
GOTERM_CC_FAT	37	8.85167	0.0495345	343	1154	14527	1.35793	1	0.599866	52.8826	GO:0031975~envelope	EI24, TNPO3, RTCB, SFXN4, TYMS, GMCL1, ACSL1, IGF2R, ACACB, TIMMDC1, POLA1, CERS6, STAT3, PRELID3A, OPA1, MAOA, GPAM, DIABLO, MRPL2, SLC9B2, HK2, ABCA8, RNF144B, CEPT1, HK1, RAP1GAP2, NDEL1, MCU, OSBPL8, NDUFA10, WDR3, DNM2, RETSAT, TOMM34, AKAP1, NUP85, COX4I1
